# Supplementary material for: Unlocking reactivity: synthetic, structural and catalytic exploration of ruthenium( ii ) complexes featuring pdc and NHC ligands
Source: Royal Society of Chemistry journal article supplement (doi:10.1039/d5nj03988f), 2025-12-08
Supplement: d5nj03988f1.pdf [file d5nj03988f1.pdf]

**Unlocking reactivity: synthetic, structural and catalytic exploration of ruthenium(II) complexes featuring pdc and NHC ligands**

Babatunde Awe,<sup>a</sup> Glendin Swart,<sup>b</sup> Elizabeth Erasmus,<sup>b</sup> Marilé Landman,<sup>\*a</sup> Frederick P. Malan<sup>\*a</sup>

<sup>a</sup> *Department of Chemistry, University of Pretoria, Lynnwood Road, Hatfield, Pretoria, 0002, South Africa.*

<sup>b</sup> *Department of Chemistry, University of the Free State, Nelson Mandela Drive, Bloemfontein, 9300, South Africa.*

\*Corresponding authors: Dr Frikkie Malan (frikkie.malan@up.ac.za), Prof Marilé Landman (marile.landman@up.ac.za)

**SUPPLEMENTARY INFORMATION**

1. Synthetic details of complexes **C2-C12**.
2. NMR spectra of complexes **C2-C12** (Figures S1-S21)
3. Crystallographic details of **C2-C6**, **C8-C12** (Tables S1-S3)
4. Electrochemical details (Figure S22)
5. Catalysis details (Table S4, Figures S23-S26, Scheme S1)

1. Synthetic details of complexes **C2-C12**.

**C2.** The ligand (0.27g, 1.5 eq) and Ag<sub>2</sub>O (0.18g, 1 eq) were stirred in DCM (10 mL) at 45 °C under an argon atmosphere in a Schlenk tube for 1 h. Complex **C1** (0.30, 1 eq) was added to the mixture and allowed to stir overnight. The reaction mixture was filtered. The product was purified by gravity silica gel column chromatography using acetone as eluent. Yield: 39%. <sup>1</sup>H NMR (400 MHz, CDCl<sub>3</sub>) δ<sub>H</sub> 8.11 (d, *J* = 7.7 Hz, 2H, CH of pdc), 7.89 (dd, *J* = 8.0, 7.4 Hz, 1H, CH of pdc), 6.61 (s, 2H, CH of imidazole), 4.69-4.68 (m, 2H, CH of COD), 3.88-3.87 (m, 2H, CH of COD), 3.68 (s, 6H, CH<sub>3</sub> of imidazole), 2.80-2.60 (m, 4H CH<sub>2</sub> of COD), 2.37-2.28 (m, 2H, CH<sub>2</sub> of COD), 2.19-2.12 (m, 2H, CH<sub>2</sub> of COD). <sup>13</sup>C NMR (400 MHz, CDCl<sub>3</sub>) δ<sub>C</sub> 170.9 (CO of pdc), 169.5 (NCN of imidazole), 149.8 (CCH of pdc), 135.8 (CH of pdc), 127.0 (CH of pdc), 124.5 (CH of imidazole), 117.5 (CH of COD), 86.2 (CH of COD), 39.8 (CH<sub>3</sub> of imidazole), 31.7 (CH<sub>2</sub> of COD), 27.5 (CH<sub>2</sub> of COD). HR-MS (ESI) *m/z* 472.1004 calcd 470.4910 (M<sup>+</sup>+2H). Elemental Analysis: calcd (**C2**·2H<sub>2</sub>O): C, 47.43; H, 5.37; N, 8.30; found: C, 47.82, H, 5.30, N, 8.45.

**C3.** The ligand (0.16g, 1.5 eq) and Ag<sub>2</sub>O (0.15g, 1 eq) were refluxed in DCM (10 mL) under an argon atmosphere in a Schlenk tube for 1 h. Complex **C1** (0.24g, 1 eq) was added to the mixture and allowed to stir overnight. The reaction mixture was filtered. The product was purified by gravity silica gel column chromatography using acetone as eluent. Yield: 16%. <sup>1</sup>H NMR (400 MHz, CDCl<sub>3</sub>) δ<sub>H</sub> 8.04 (dd, *J* = 18.2, 7.7 Hz, 2H, CH of pdc), 7.86 (dd, *J* = 10.4, 5.0 Hz, 1H, CH of pdc), 6.66 (d, *J* = 1.9 Hz, 1H, CH of imidazole), 6.61 (d, *J* = 1.9 Hz, 1H, CH of imidazole), 5.28-4.87 (m, 2H, CH<sub>2</sub> of alkenyl tether), 4.72 (d, *J* = 3 Hz, 2H, CH of COD), 4.49-4.48 (m, 1H, CH of alkenyl tether), 3.90-3.80 (m, 2H, CH of COD), 3.76 (s, 3H, CH<sub>3</sub> of imidazole), 3.73 (s, 1H, CH of alkenyl tether), 2.78-2.62 (m, 4H, CH<sub>2</sub> of COD), 2.36-2.30 (m, 2H, CH<sub>2</sub> of COD), 2.19-2.17 (m, 2H, CH<sub>2</sub> of COD), 1.71 (s, 3H, CH<sub>3</sub> of alkenyl tether). <sup>13</sup>C NMR (400 MHz, CDCl<sub>3</sub>) δ<sub>C</sub> 171.0 (NCN of imidazole), 169.7 (CO of pdc), 143.6 (CCH of pdc), 135.7 (CH of pdc), 126.9 (CH of pdc), 125.1 (CH of imidazole), 123.6 (CH of imidazole), 117.7 (CH of COD), 111.0 (=CH<sub>2</sub> of alkenyl tether), 86.4 (CH of COD), 55.2 (CH<sub>2</sub> of alkenyl tether), 40.1 (CH<sub>3</sub> of imidazole), 31.8 (CH<sub>2</sub> of COD), 27.4 (CH<sub>2</sub> of COD), 20.3 (CH<sub>3</sub> of alkenyl tether). HR-MS (ESI) *m/z* 512.4423 calcd 510.5560 (M<sup>+</sup>+2H). Elemental Analysis: calcd (**C3**·0.6CH<sub>2</sub>Cl<sub>2</sub>): C, 50.48; H, 5.06; N, 7.48; found: C, 50.67, H, 4.99, N, 7.82.

**C4.** The ligand (0.20g, 1.5 eq) and Ag<sub>2</sub>O (0.12g, 1 eq) were stirred in DCM (10 mL) at 45 °C under an argon atmosphere in a Schlenk tube for 1 h. Complex **C1** (0.21, 1 eq) was added to the mixture and allowed to stir overnight. The reaction mixture was filtered. The product was purified by gravity silica gel column chromatography using acetone as eluent. Yield: 32%. <sup>1</sup>H

NMR (400 MHz, CDCl<sub>3</sub>)  $\delta_{\text{H}}$  7.80-7.78 (m, 2H, CH of pdc), 7.35 (s, 1H, CH of pdc), 7.18-7.10 (m, 3H, CH of benzyl), 6.69-6.66 (m, 3H, CH of benzyl and imidazole), 6.54 (d,  $J$  = 1.9 Hz, 1H, CH of imidazole), 5.62-5.20 (m, 2H, CH<sub>2</sub> of benzyl), 4.81-4.80 (m, 2H, CH of COD), 3.82-3.80 (m, 5H, CH<sub>3</sub> of imidazole and CH of COD), 2.74-2.64 (m, 4H, CH<sub>2</sub> of COD), 2.37-2.27 (m, 2H, CH<sub>2</sub> of COD), 2.19-2.11 (m, 2H, CH<sub>2</sub> of COD). <sup>13</sup>C NMR (300 MHz, CDCl<sub>3</sub>)  $\delta_{\text{C}}$  170.8 (NCN of imidazole), 170.2 (CO of pdc), 149.7 (CCH of pdc), 137.8 (CCH of benzyl), 135.7 (CH of pdc), 128.5 (CH of benzyl), 127.2 (CH of benzyl), 126.8 (CH of pdc), 126.2 (CH of benzyl), 125.3 (CH of imidazole), 123.5 (CH of imidazole), 117.5 (CH of COD), 86.5 (CH of COD), 53.2 (CH<sub>2</sub> of benzyl), 40.0 (CH<sub>3</sub> of imidazole), 31.6 (CH<sub>2</sub> of COD), 27.4 (CH<sub>2</sub> of COD). HR-MS (ESI)  $m/z$  548.1398 calcd 546.5890 (M<sup>+</sup>+2H). Elemental Analysis: calcd (C<sub>4</sub>.H<sub>2</sub>O): C, 55.31; H, 5.18; N, 7.44; found: C, 55.18, H, 4.90, N, 7.42.

**C5.** Yield: 30%. The sensitive nature of this complex in solution precluded the use of <sup>13</sup>C NMR spectroscopy as it degraded *in situ* over the time range required for a spectrum with a high signal-to-noise ratio. Similarly, mass spectrometry, CHN analysis, and cyclic voltammetry could not be utilised in this case. <sup>1</sup>H NMR (400 MHz, CDCl<sub>3</sub>)  $\delta_{\text{H}}$  8.06-7.49 (m, 8H), 7.02 (s 1H, CH of imidazole), 6.73 (s, 1H, CH of imidazole), 4.43-4.41 (m, 2H, CH of COD), 3.58 (s, 3H, CH<sub>3</sub> of imidazole), 3.51-3.49 (m, 2H, CH of COD), 2.61-2.15 (m, 12H, CH<sub>2</sub> of COD and CH<sub>2</sub> ethyl).

**C6.** The ligand (0.24g, 1.5 eq) and Ag<sub>2</sub>O (0.13g, 1 eq) were stirred in DCM (10 mL) at 45 °C under an argon atmosphere in a Schlenk tube for 1 h. Complex **C1** (0.23, 1 eq) was added to the mixture and allowed to stir overnight. The reaction mixture was filtered. The product was purified by gravity silica gel column chromatography using a mixture of ethyl acetate/acetone as eluent (1:4). Yield: 38%. <sup>1</sup>H NMR (400 MHz, CDCl<sub>3</sub>)  $\delta_{\text{H}}$  8.11-7.80 (m, 3H, CH of pdc and 2H of benzyl), 7.85-7.76 (m, 2H, CH of pdc), 6.79-6.76 (m, 2H, CH of benzyl and 1H, CH of imidazole), 6.57-6.56 (d,  $J$  = 1.6 Hz, 1H, CH of imidazole), 6.01 (m, 1H, CH<sub>2</sub> of benzyl), 5.32 (m, CH<sub>2</sub> of benzyl), 4.76-4.71 (m, 2H, CH of COD), 3.86-3.68 (m, 5H, CH<sub>3</sub> of imidazole and CH of COD), 2.74-2.50 (m, 4H, CH<sub>2</sub> of COD), 2.40-2.07 (m, 4H, CH<sub>2</sub> of COD). <sup>13</sup>C NMR (300 MHz, CDCl<sub>3</sub>)  $\delta_{\text{C}}$  171.9 (CO of pdc), 170.8 (NCN of imidazole), 149.9 (CCH of pdc), 147.5 (CCH of benzyl), 136.0 (CH of pdc), 127.0 (CH of pdc), 126.8 (CH of benzyl), 126.2 (CH of imidazole), 123.8 (CH of benzyl), 125.3 (CH of imidazole) 123.5 (CH of imidazole), 117.9 (CH of COD), 86.6 (CH of COD), 52.8 (CH<sub>2</sub> of benzyl), 40.3 (CH<sub>3</sub> of imidazole), 31.7 (CH<sub>2</sub> of COD), 27.5 (CH<sub>2</sub> of COD). HR-MS (ESI)  $m/z$  593.0369 calcd 591.5900 (M<sup>+</sup>+H). Elemental Analysis: calcd (C<sub>6</sub>.0.5H<sub>2</sub>O): C, 52.00, H, 4.53, N, 9.33; found: C, 52.15, H, 4.31, N, 8.98.

**C7.** The ligand (0.14g, 1.5 eq) and Ag<sub>2</sub>O (0.08g, 1 eq) were stirred in DCM (10 mL) at 42 °C under an argon atmosphere in a Schlenk tube for 1 h. Complex **C1** (0.13, 1 eq) was added to the mixture and allowed to stir overnight. The reaction mixture was filtered. The product was purified by gravity silica gel column chromatography with a mixture of acetone/ethyl acetate as eluent. Yield: 61%. <sup>1</sup>H NMR (300 MHz, CDCl<sub>3</sub>) δ<sub>H</sub> 8.17-7.99 (d, *J* = 8.7 Hz, 2H, CH of pdc), 7.87-7.70 (m, 3H, CH of pdc and benzyl), 7.31-7.21 (m, 4.6 Hz, 3H, CH of benzyl), 6.88 (d, *J* = 8 Hz, 2H, CH of benzyl), 6.81-6.70 (m, 1H, CH of benzyl), 6.69-6.62 (m, 1H, CH of imidazole), 6.61-6.60 (d, *J* = 3Hz, 1H, CH of imidazole), 6.04 (d, *J* = 12.6Hz, 1H, CH<sub>2</sub> of benzyl), 5.72-5.45 (m, 3H, CH<sub>2</sub> of benzyl), 4.95-4.79 (m, 2H, CH of COD), 3.80-3.74 (m, 2H, CH of COD), 2.73-2.71 (m, 2H, CH<sub>2</sub> of COD), 2.58 (m, 2H, CH<sub>2</sub> of COD), 2.38-2.29 (m, 4H, CH<sub>2</sub> of COD). <sup>13</sup>C NMR (300 MHz, CDCl<sub>3</sub>) δ<sub>C</sub> 172.4 (CO of pdc), 170.7 (NCN of imidazole), 147.2 (CCH of pdc), 145.3 (CCH of benzyl), 137.5 (CCH of benzyl), 135.8 (CH of pdc), 128.8 (CH of benzyl), 127.6 (CH of pdc), 126.8 (CH of benzyl), 126.5 (CH of benzyl), 125.0 (CH of benzyl), 124.2 (CH of imidazole), 123.8 (CH of imidazole), 117.9 (CH of COD), 86.7 (CH of COD), 53.8 (CH<sub>2</sub> of benzyl), 53.0 (CH<sub>2</sub> of benzyl), 31.6(CH<sub>2</sub> of COD), 28.0-27.5 (4H, CH<sub>2</sub> of COD) . HR-MS (ESI) *m/z* 669.1622 calcd 667.6840 (M<sup>+</sup>+2H). Elemental Analysis: calcd (**C7**·0.3CH<sub>2</sub>Cl<sub>2</sub>): C, 55.97; H, 4.45; N, 8.08; found: C, 55.74, H, 4.23, N, 7.99.

**C8.** The ligand (0.31g, 1.5 eq) and Ag<sub>2</sub>O (0.12g, 1 eq) were stirred in DCM (10 mL) at 45 °C under an argon atmosphere in a Schlenk tube for 1 h. Complex **C1** (0.21g, 1 eq) was added to the mixture and allowed to stir overnight. The reaction mixture was filtered. The product was purified by gravity silica gel column chromatography a mixture of acetone/ethyl acetate as eluent. Yield: 25%. <sup>1</sup>H NMR (400 MHz, CDCl<sub>3</sub>) δ<sub>H</sub> 8.13-7.74 (m, 6H, CH of pdc and phenyl), 7.50-6.91 (m, 8H, CH of pdc and phenyl), 6.73-6.70 (m, 3H, CH of phenyl and imidazole), 6.53 (d, *J* = 1.9 Hz, 1H, CH of imidazole), 6.10-5.94 (m, 1H, CH<sub>2</sub>), 5.60-5.30 (m, 1H, CH<sub>2</sub>), 4.90-4.60 (m, 3H, CH of COD and CH<sub>2</sub> of ethyl), 4.35 (m, 1H, CH<sub>2</sub> of ethyl), 3.83-3.70 (m, 2H, CH of COD), 3.21-3.18 (m, 1H, CH<sub>2</sub> of ethyl), 2.80-2.11 (m, 9H, CH<sub>2</sub> of COD and ethyl). <sup>13</sup>C NMR (300 MHz, CDCl<sub>3</sub>) δ<sub>C</sub> 171.3 (CO of pdc), 170.7 (NCN of imidazole), 149.6 (CCH of pdc), 147.1 (CCH of benzyl), 145.5 (CCH of benzyl), 137.8 (CCH of benzyl), 135.9 (CH of pdc), 129.1 (CH of benzyl), 128.7 (CH of benzyl), 127.2 (CH of pdc), 127.0 (CH of benzyl), 126.9 (CH of benzyl), 126.9 (CH of imidazole), 126.6 (CH of benzyl), 124.9 -123.7 (CH of benzyl and imidazole), 118.2-117.8 (CH of COD), 86.7 (CH of COD), 52.9 (CH<sub>2</sub> of benzyl), 52.0 (CH<sub>2</sub> of ethylbn) 38.3 (CH<sub>2</sub> of ethylbn), 31.8-31.4 (CH<sub>2</sub> of COD), 27.4 (CH<sub>2</sub> of COD. HR-MS (ESI) *m/z* 683.1798 calcd 681.7110 (M<sup>+</sup>+2H). Elemental Analysis: calcd (**C8**·0.5H<sub>2</sub>O): C, 57.38; H, 4.82; N, 8.11; found: C, 56.88, H, 4.37, N, 8.24.

**C9.** The ligand (0.14g, 1.5 eq) and Ag<sub>2</sub>O (0.08g, 1 eq) were stirred in DCM (10 mL) at 42 °C under an argon atmosphere in a Schlenk tube for 1 h. Complex **C1** (0.13, 1 eq) was added to the mixture and allowed to stir overnight. The reaction mixture was filtered. The product was purified by gravity silica gel column chromatography with a mixture of acetone/ethyl acetate as eluent. Yield: 8%. <sup>1</sup>H NMR (300 MHz, CDCl<sub>3</sub>) δ<sub>H</sub> 8.08-8.05 (d, *J* = 8 Hz, 4H, CH of benzyl), 7.81-7.78 (m, 3H, CH of pdc), 6.92 (d, *J* = 8 Hz, 4H, CH of benzyl), 6.71 (s, 2H, CH of imidazole), 6.05 (d, *J* = 17.4 Hz, 2H, CH<sub>2</sub> of benzyl), 5.53 (d, *J* = 17.0 Hz, 2H, CH<sub>2</sub> of benzyl), 4.77 (m, 2H, CH of COD), 3.73 (m, 2H, CH of COD), 2.74-2.10 (m, 8H, CH<sub>2</sub> of COD). <sup>13</sup>C NMR (300 MHz, CDCl<sub>3</sub>) δ<sub>C</sub> 173.4 (NCN of imidazole), 170.6 (CO of pdc), 149.6 (CCH of pdc), 147.4 (CCH of benzyl), 144.9 (CCH of benzyl), 136.1 (CH of pdc), 127.0 (CH of pdc), 127.0 (CH of benzyl), 124.9 (CH of imidazole), 124.0 (CH of benzyl), 118.2 (CH of COD), 86.7 (CH of COD), 53.2 (CH<sub>2</sub> of benzyl), 31.6 (CH<sub>2</sub> of COD), 27.4 (CH<sub>2</sub> of COD). HR-MS (ESI) *m/z* 714.1472 calcd 712.6810 (M<sup>+</sup>+2H). Elemental Analysis: calcd (**C9**): C, 53.93; H, 4.10; N, 9.83; found: C, 54.01, H, 4.01, N, 9.53.

**C10.** The imidazolium ligand (0.16g, 2eq) and Ag<sub>2</sub>O (0.12g, 1eq) were stirred in DMF at 90°C under an argon atmosphere in a Schlenk tube for 1 h. **C1** (0.20, 1 eq) was added to the mixture and allowed to stir overnight. The crude was filtered through silica; methanol was added and concentrated under vacuo. The product was recrystallised with diethyl ether/DMF-MeOH. The product was then washed with ethyl acetate. Yield: 69%. <sup>1</sup>H NMR (300 MHz, MeOD) δ<sub>H</sub> 8.30-8.27 (m, 2H, CH of pdc), 8.14-8.11 (m, 1H, CH of pdc), 7.35 (s, 1H, CH of imidazole), 6.76 (s, 1H, CH of imidazole), 4.80-4.40 (m, 3H, CH and CH<sub>2</sub> of alkenyl tether), 4.19-3.69 (m, 5H, CH and CH<sub>2</sub> of alkenyl tether), 2.10 (s, 3H CH<sub>3</sub> of alkenyl tether), 1.27 (s, 3H, CH<sub>3</sub> of alkenyl tether). <sup>13</sup>C NMR (75 MHz, MeOD) δ<sub>C</sub> 175.8 (NCN of imidazole), 174.1 (CO of pdc), 153.3 (CCH of pdc), 151.3 (CCH of pdc), 143.0 (C=CH<sub>2</sub> of alkenyl tether), 138.2 (CH of pdc), 128.9 (CH of pdc), 128.5 (CH of pdc), 124.6 (CH of imidazole), 121.4 (CH of imidazole), 110.8 (=CH<sub>2</sub> of alkenyl tether), 94.9 (-CCH<sub>2</sub> of imidazole), 65.3 (=CH<sub>2</sub> of alkenyl tether), 55.3 (CH<sub>2</sub> of alkenyl tether), 54.0 (CH<sub>2</sub> of alkenyl tether), 22.2 (CH<sub>3</sub> of imidazole), 19.8 (CH<sub>3</sub> of imidazole). HR-MS (ESI) *m/z* 462.9854 calcd 460.4500 (M<sup>+</sup>+2H). Elemental Analysis: calcd (**C10**·0.5CHCl<sub>3</sub>): C, 42.72, H, 4.17, N, 8.08; found: C, 42.93, H, 4.22, N, 7.72.

**C11.** The imidazolium ligand (0.20g, 2eq) and Ag<sub>2</sub>O (0.13g, 1eq) were stirred in DMF at 120°C under an argon atmosphere in a Schlenk tube for 1 h. Complex [Ru(pdc)(COD)(N-methylimidazole)] (0.25, 1 eq) was added to the mixture and allowed to stir for about 2 days. Diethyl ether was added to the reaction mixture and was purified column chromatography using acetone as eluent. Yield: 13%. <sup>1</sup>H NMR (300 MHz, CDCl<sub>3</sub>) δ<sub>H</sub> 8.12-8.09 (m, 2H, CH of pdc),

7.90-7.86 (m, 1H, CH of pdc), 7.09 (s, 1H, CH of methylimidazole), 6.95 (d,  $J = 1.9$  Hz, 1H, CH of methylimidazole), 6.61-6.59 (m, 2H, CH of alkenyl tether), 6.44 (d,  $J = 1.9$  Hz, 1H, CH of methylimidazole), 4.59 (d,  $J = 9$  Hz, 1H, CH<sub>2</sub> of alkene), 4.21 (d,  $J = 9$  Hz, 1H, CH<sub>2</sub> of alkene), 3.80 (d,  $J = 5$  Hz, 2H, CH<sub>2</sub> of alkenyl tether), 3.53 (s, 3H, CH<sub>3</sub> of methylimidazole), 2.86 (s, 3H, CH<sub>3</sub> of imidazole), 1.70 (s, 3H, CH<sub>3</sub> of alkenyl tether). <sup>13</sup>C NMR (400 MHz, CDCl<sub>3</sub>)  $\delta_c$  181.0 (NCN of imidazole), 172.1 (CO of pdc), 150.8 (CCH of pdc), 149.9 (CCH of pdc), 137.3 (CH of imidazole), 134.9, 127.9 (CH of pdc), 127.1 (CH of pdc), 126.7 (CH of imidazole), 122.8 (CH of imidazole), 120.4 (CH of imidazole), 118.7 (CH of imidazole), 91.1 (-CCH<sub>2</sub> of alkenyl tether), 65.4 (CH<sub>2</sub> of alkene), 55.0 (CH<sub>2</sub> of alkenyl tether), 34.9 (CH<sub>3</sub> of methylimidazole), 34.2 (CH<sub>3</sub> of alkenyl tether), 22.4 (CH<sub>3</sub> of alkenyl tether). HR-MS (ESI)  $m/z$  485.0881 calcd 484.4780 ( $M^+ + 1H$ ). Elemental Analysis: calcd (C11.CH<sub>2</sub>Cl<sub>2</sub>) C, 42.19, H, 4.07, N, 12.30 found; C, 42.08, H, 4.28, N, 12.15.

**C12.** The imidazolium ligand (0.16g, 2eq) and Ag<sub>2</sub>O (0.11g, 1eq) were stirred in DMF at 120°C under an argon atmosphere in a Schlenk tube for 1 h. Complex [Ru(pdc)(COD)(4-phenylpyridine)] (0.25, 1 eq) was added to the mixture and allowed to stir for about 2 days. Diethyl ether was added and the crude was washed with diethyle ether. Further purification was done by solvent wash using water, followed by diethyl ether and ethyl acetate. The product was also redissolved using DCM, filtered and concentrated under vacuo. Yield: 61%. <sup>1</sup>H NMR (400 MHz, CDCl<sub>3</sub>)  $\delta_H$  8.15-8.05 (m, 4H, CH of pdc and CH of 4-Phpy), 7.92 (t,  $J = 7.7$  Hz, 1H, CH of pdc), 7.52-7.35 (m, 7H, CH of 4-Phpy), 6.98 (d,  $J = 1.9$  Hz, 1H, CH of imidazole), 6.48 (d,  $J = 1.9$  Hz, 1H, CH of imidazole), 4.60 (d,  $J = 12.4$  Hz, 1H, =CH<sub>2</sub> of alkenyl tether), 4.24 (d,  $J = 12.4$  Hz, 1H, =CH<sub>2</sub> of alkenyl tether), 3.85 (d,  $J = 44.4$  Hz, 2H, CH<sub>2</sub> of alkenyl tether), 2.88 (s, 3H, CH<sub>3</sub> of imidazole), 1.65 (s, 3H, CH<sub>3</sub> of alkenyl tether). <sup>13</sup>C NMR (300 MHz, CDCl<sub>3</sub>)  $\delta$  179.2 (NCN of imidazole), 172.0 (CO of pdc), 150.5 (CCH of 4-Phpy), 150.2 (CCH of pdc), 149.7 (CCH of 4-Phpy), 148.8 (CH of 4-Phpy), 136.4 (CH of pdc), 135.5 (CH of 4-Phpy), 129.8 (CH of 4-Phpy), 129.3 (CH of 4-Phpy), 127.4 (CH of pdc), 126.9 (CH of 4-Phpy), 123.2 (CH of imidazole), 122.3 (CH of 4-Phpy), 119.0 (CH of imidazole), 91.3 (-CCH<sub>2</sub> of imidazole), 65.7 (CH<sub>2</sub> of alkenyl tether), 54.8 (=CH<sub>2</sub> of alkenyl tether), 35.0 (CH<sub>3</sub> of imidazole), 22.5 (CH<sub>3</sub> of alkenyl tether). HR-MS (ESI)  $m/z$  559.1176 calcd 557.5720 ( $M^+ + 2H$ ). Elemental Analysis: calcd (C12.CH<sub>2</sub>Cl<sub>2</sub>) C, 50.47, H, 4.08, N, 8.72; found; C, 50.51, H, 3.78, N, 9.33.

2. NMR spectra of complexes **C2-C12** (Figures S1-S20)

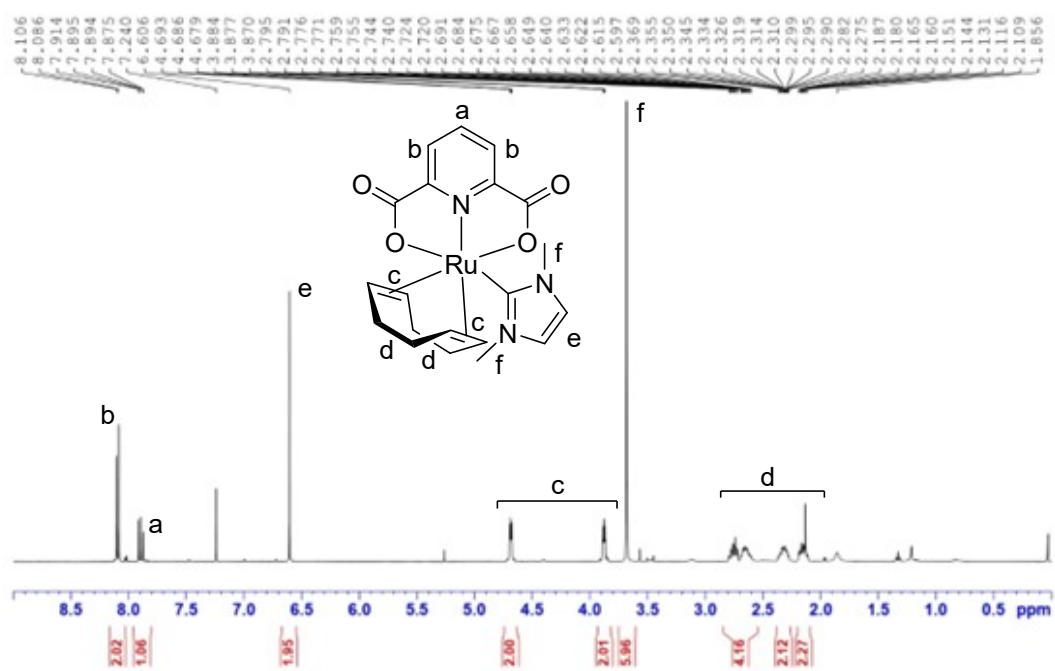

Figure S1 C2: <sup>1</sup>H NMR spectrum

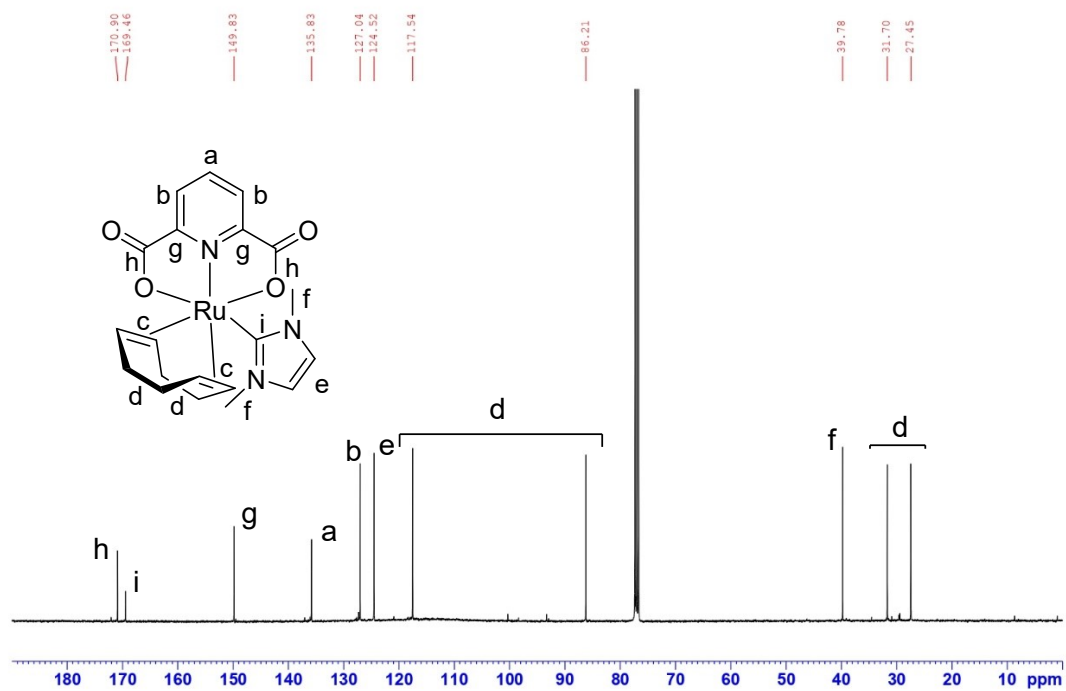

Figure S2 C2: <sup>13</sup>C NMR spectrum

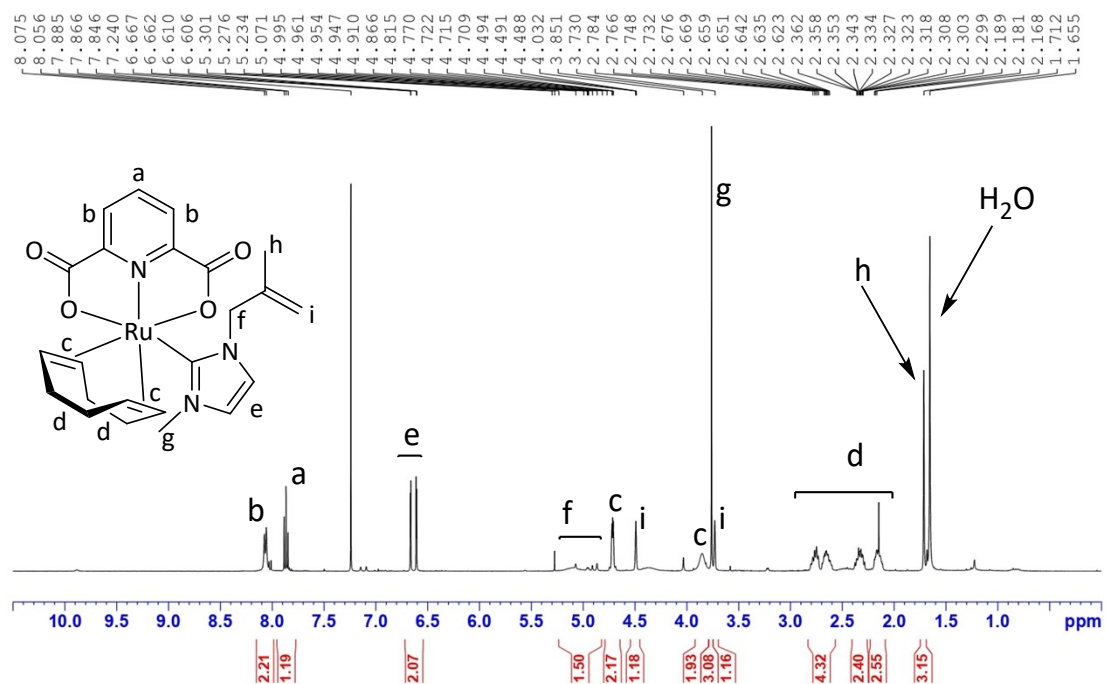

Figure S3 C3: <sup>1</sup>H NMR spectrum

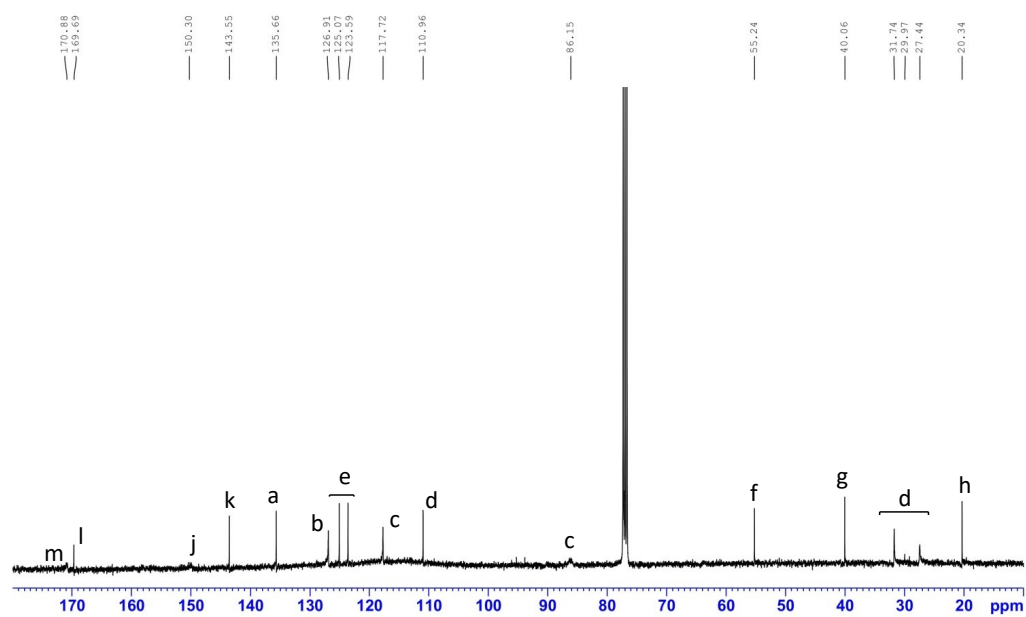

Figure S4 C3: <sup>13</sup>C NMR spectrum



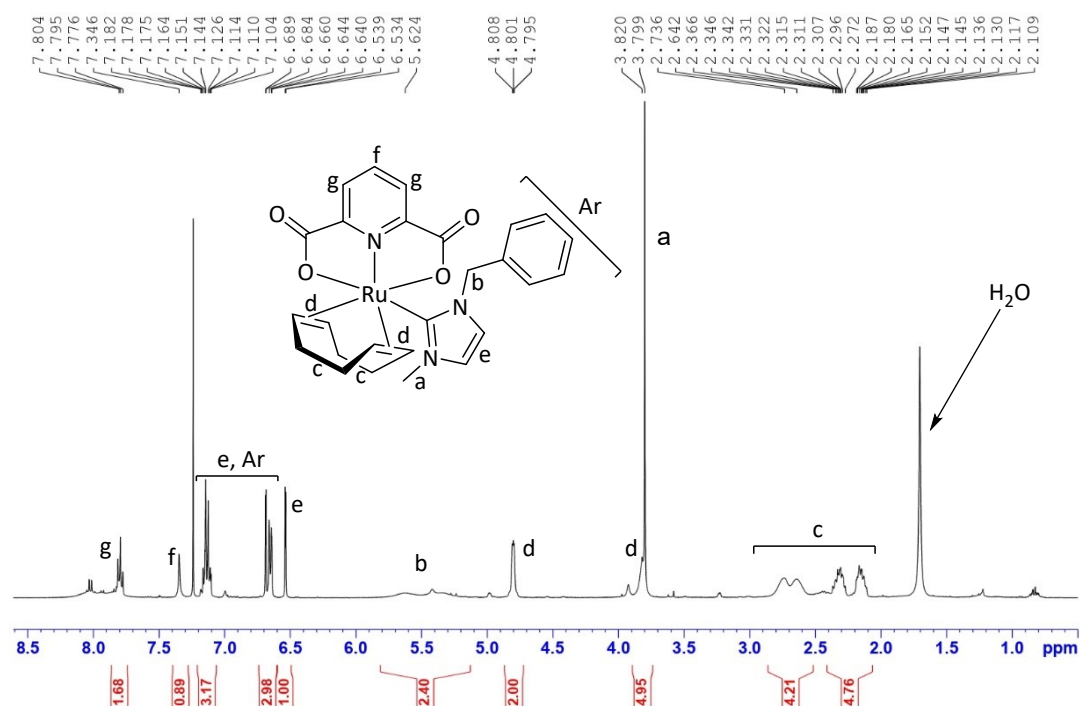

Figure S5 C4:  $^1\text{H}$  NMR spectrum

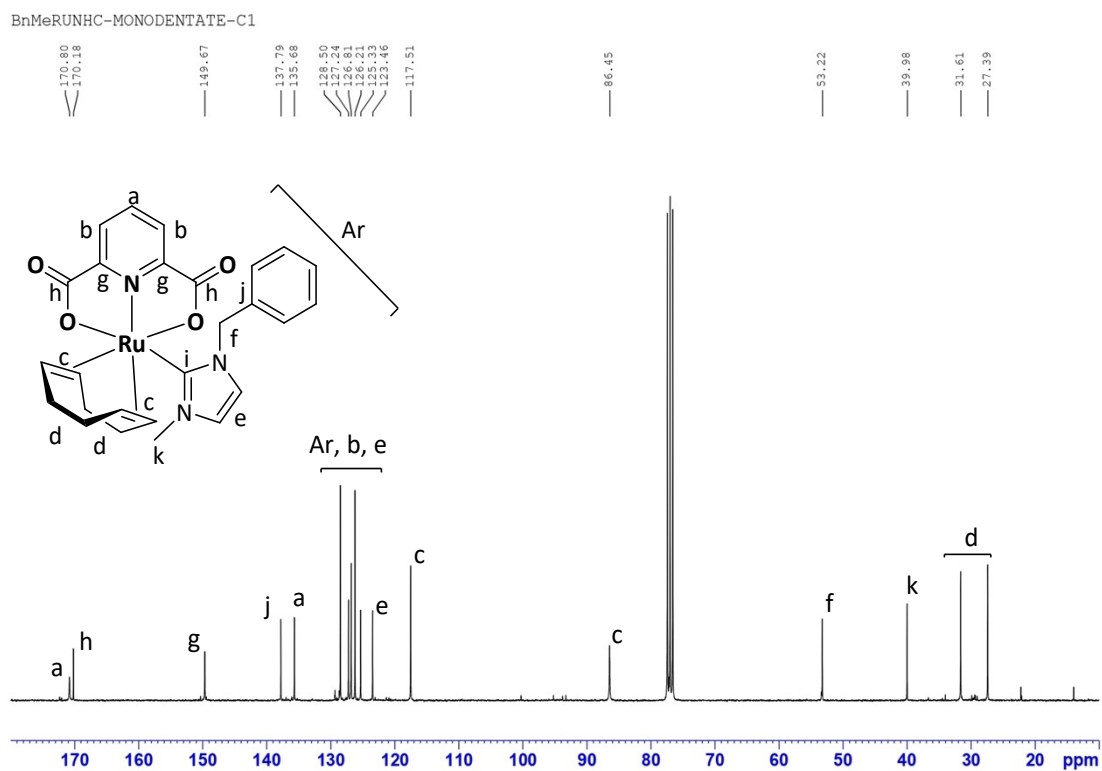

Figure S6 C4:  $^{13}\text{C}$  NMR spectrum

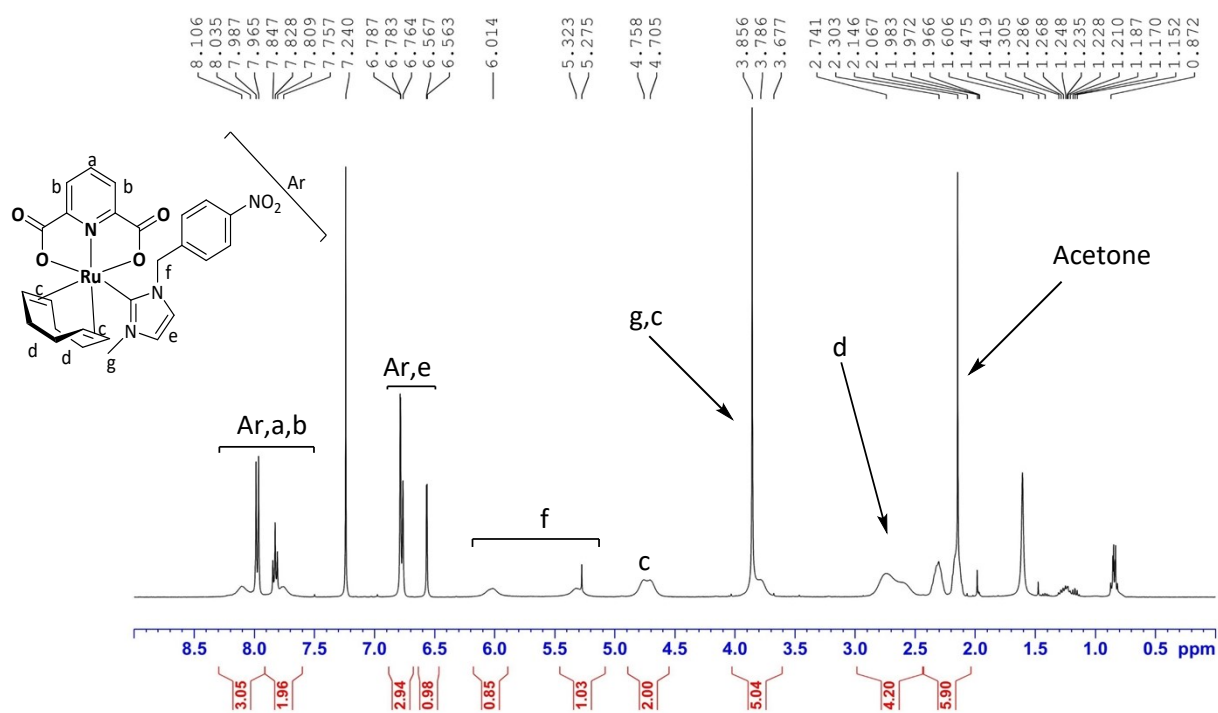

Figure S7 C6: <sup>1</sup>H NMR spectrum

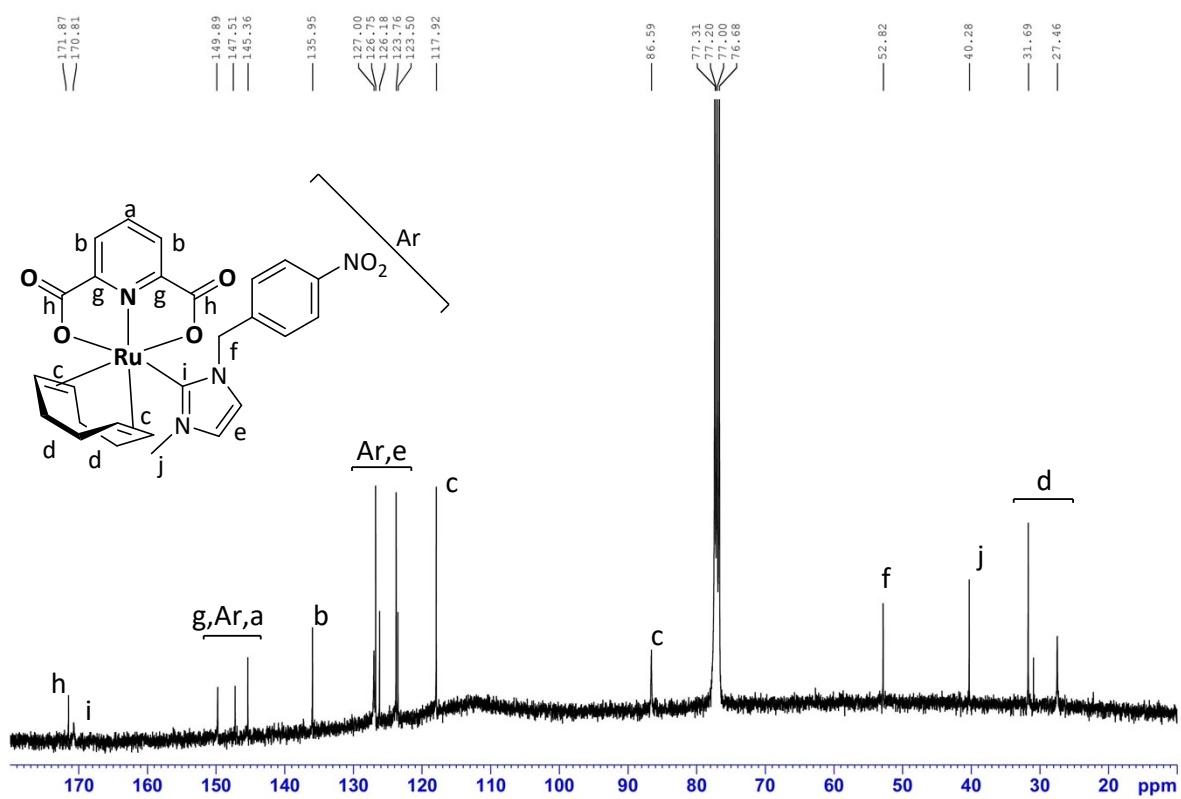

Figure S8 C6: <sup>13</sup>C NMR spectrum

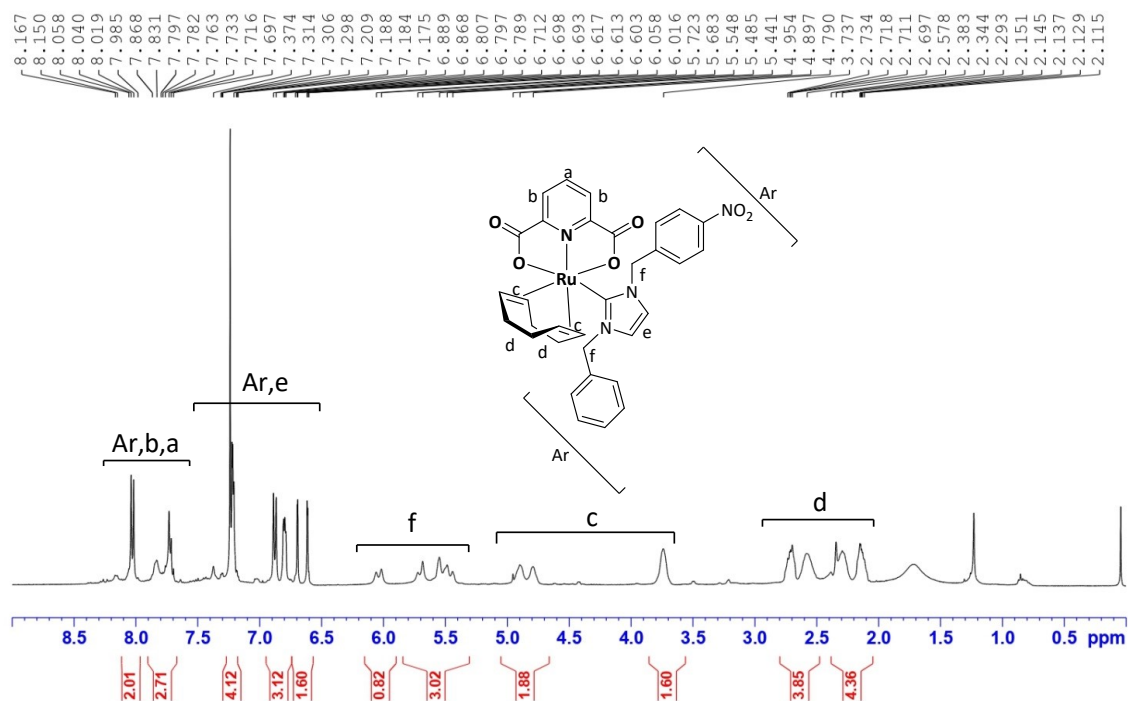

Figure S9 C7:  $^1\text{H}$  NMR spectrum

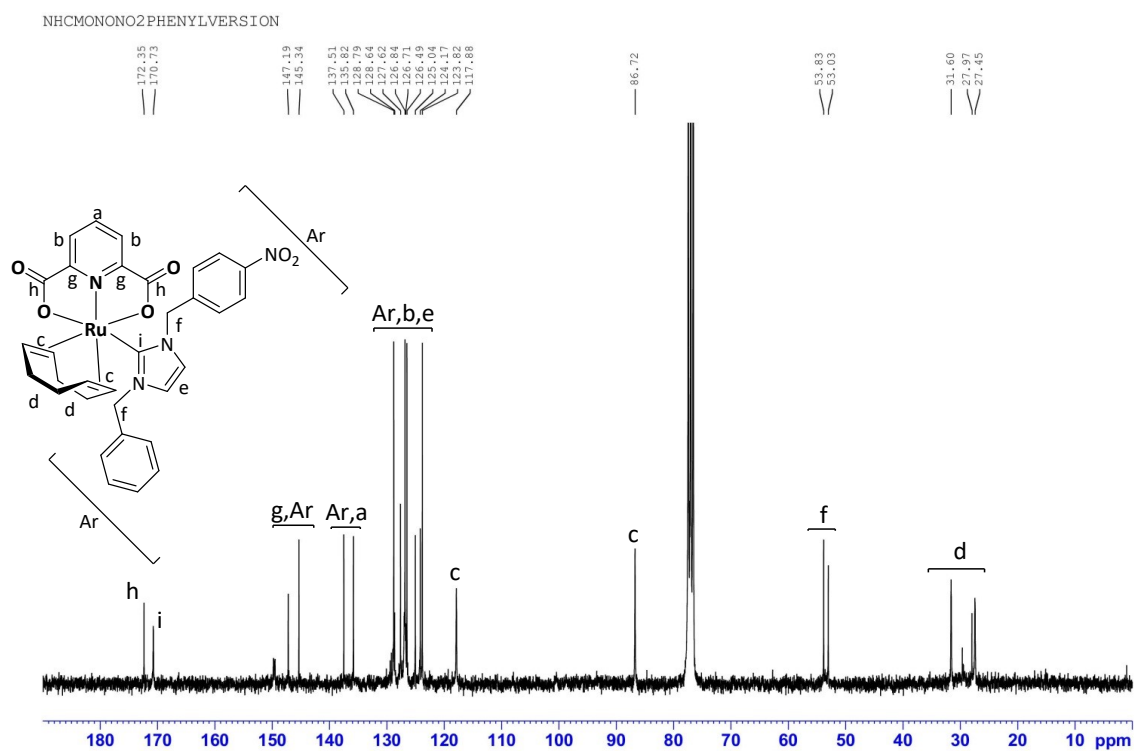

Figure S10 C7:  $^{13}\text{C}$  NMR spectrum

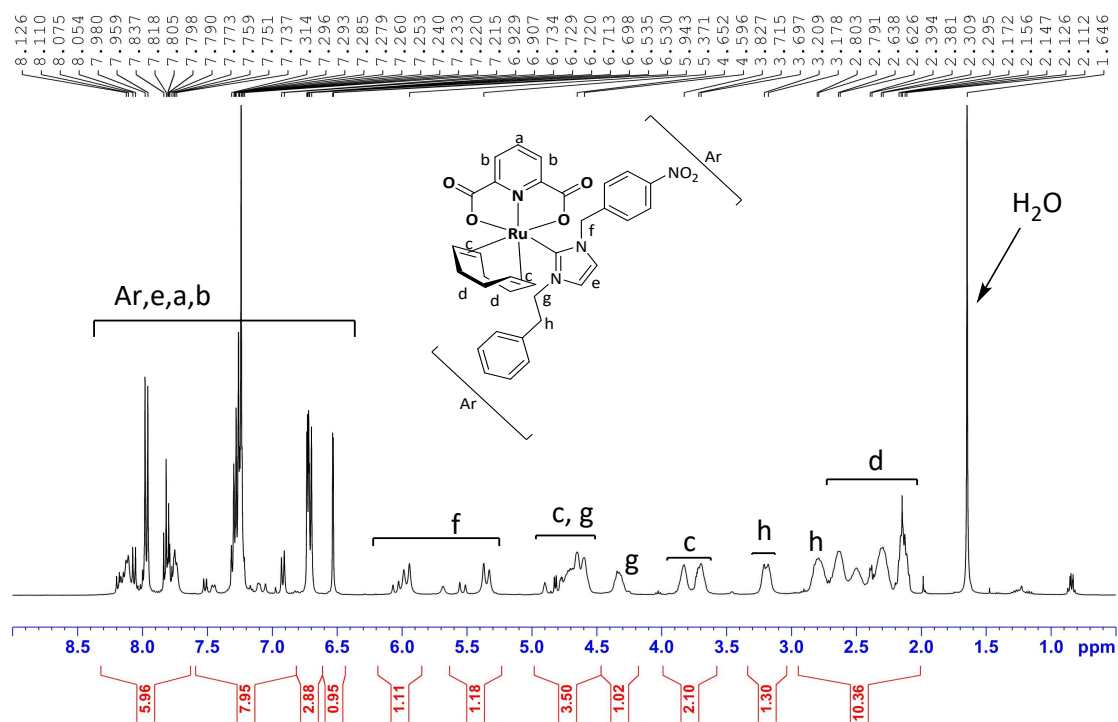

Figure S11 C8:  $^1\text{H}$  NMR spectrum

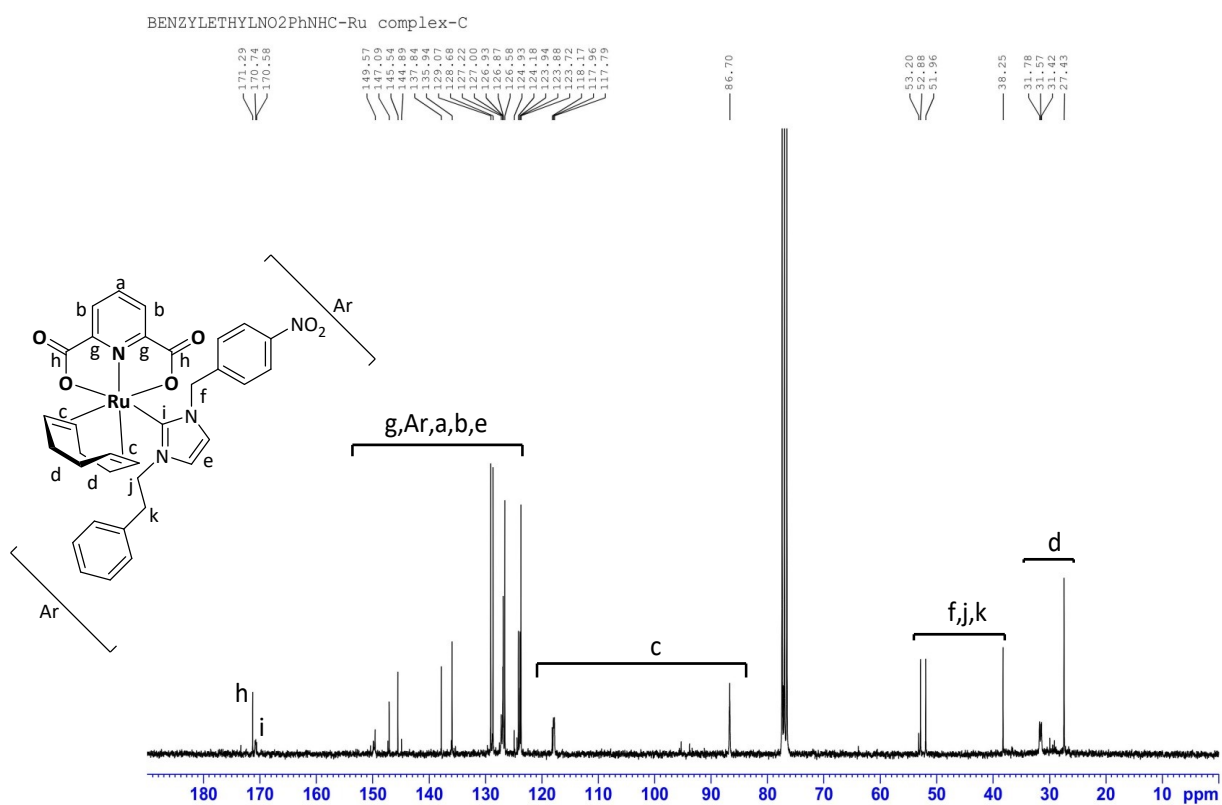

Figure S12 C8:  $^{13}\text{C}$  NMR spectrum

NHCbisNO2PHENYLVERSION

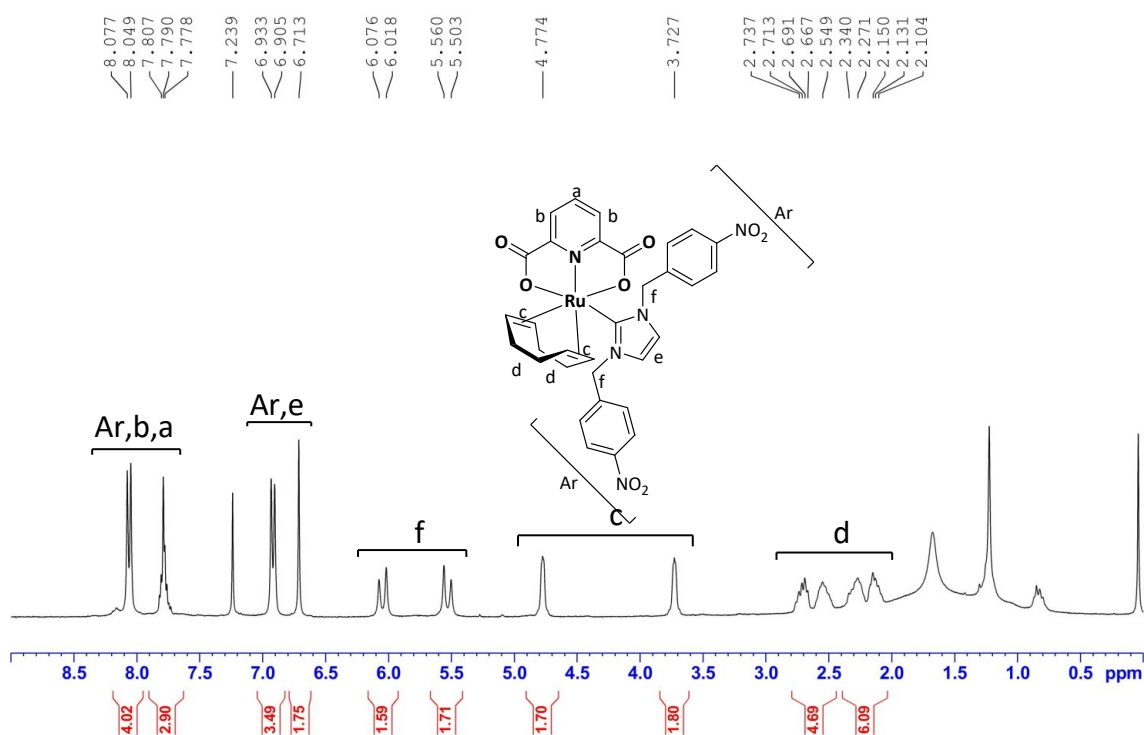

Figure S13 C9: <sup>1</sup>H NMR spectrum

NHCbisNO2PHENYLVERSION-C

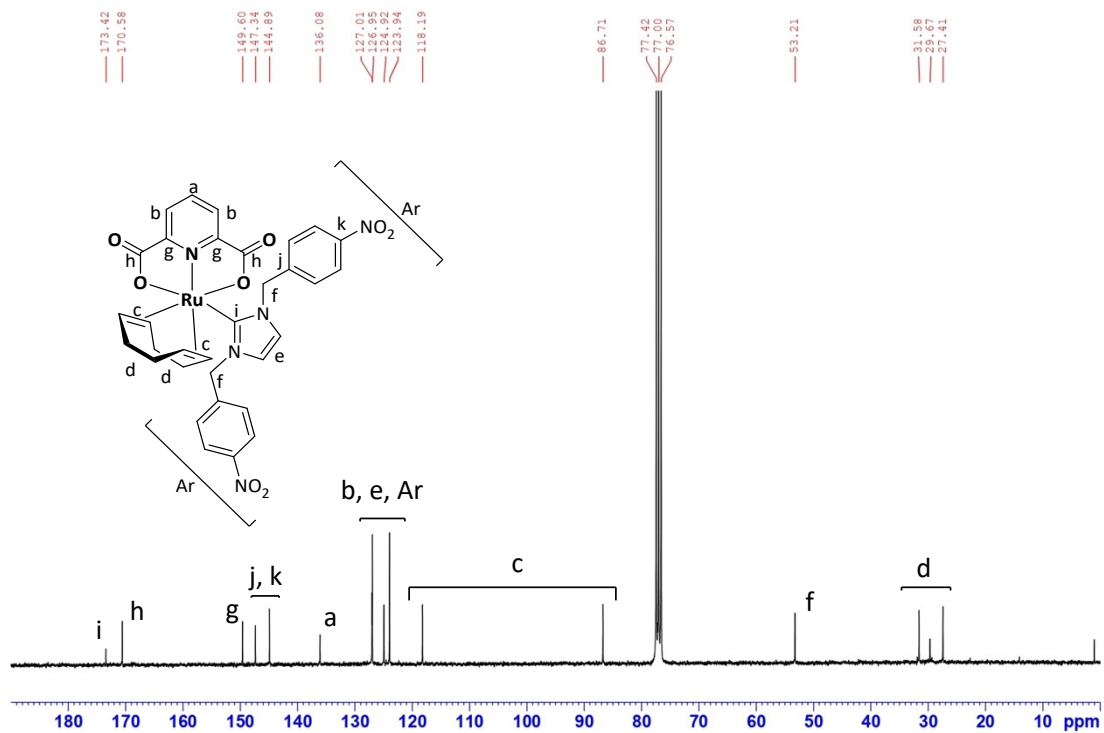

Figure S14 C9: <sup>13</sup>C NMR spectrum

bidendate-bispropylmethyl-aqua-Ru-complexMEODTRIAL3

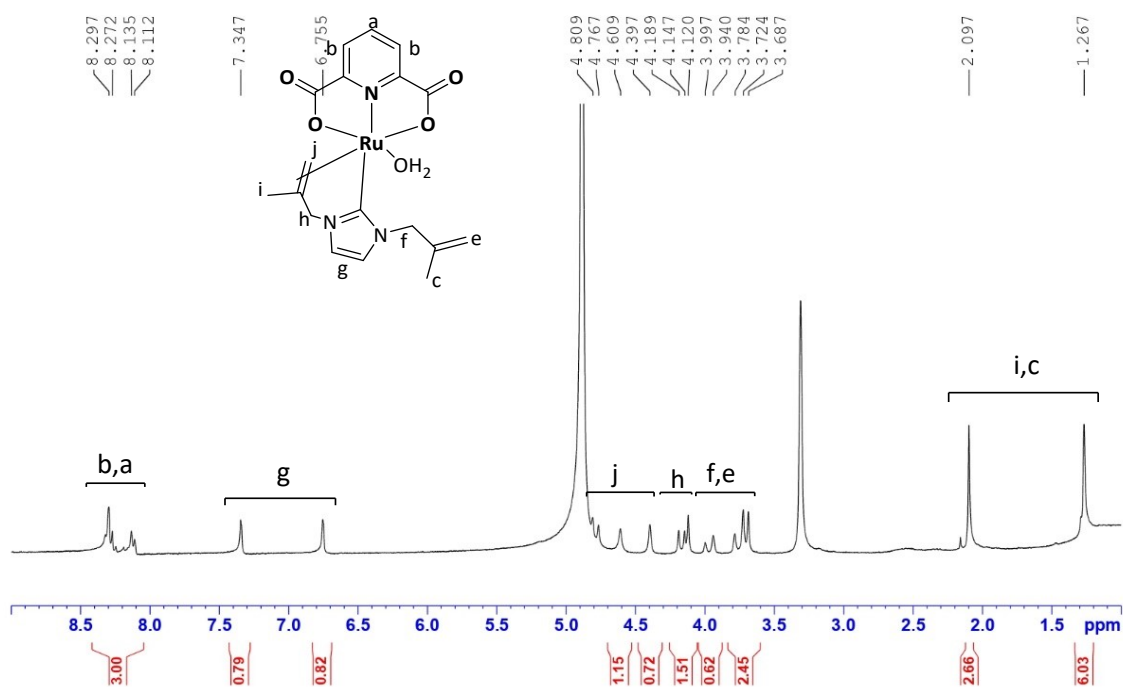

Figure S15 C10:  $^1\text{H}$  NMR spectrum

bidendate-bispropylmethyl-aqua-Ru-complexMEODTRIAL3C

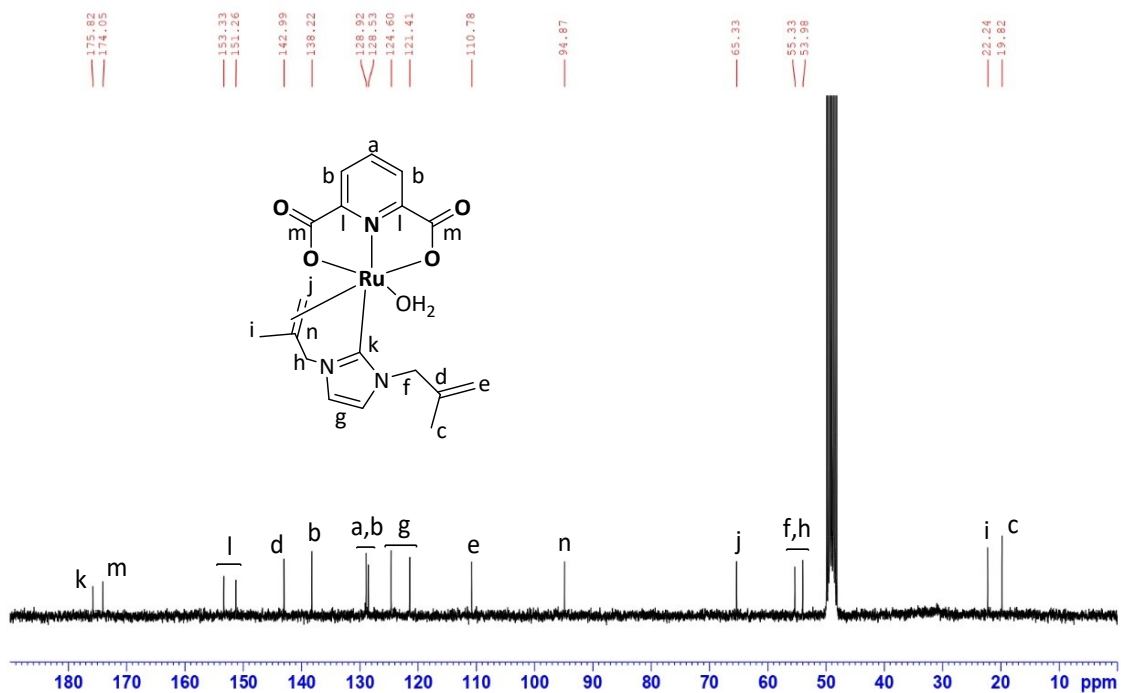

Figure S16 C10:  $^{13}\text{C}$  NMR spectrum

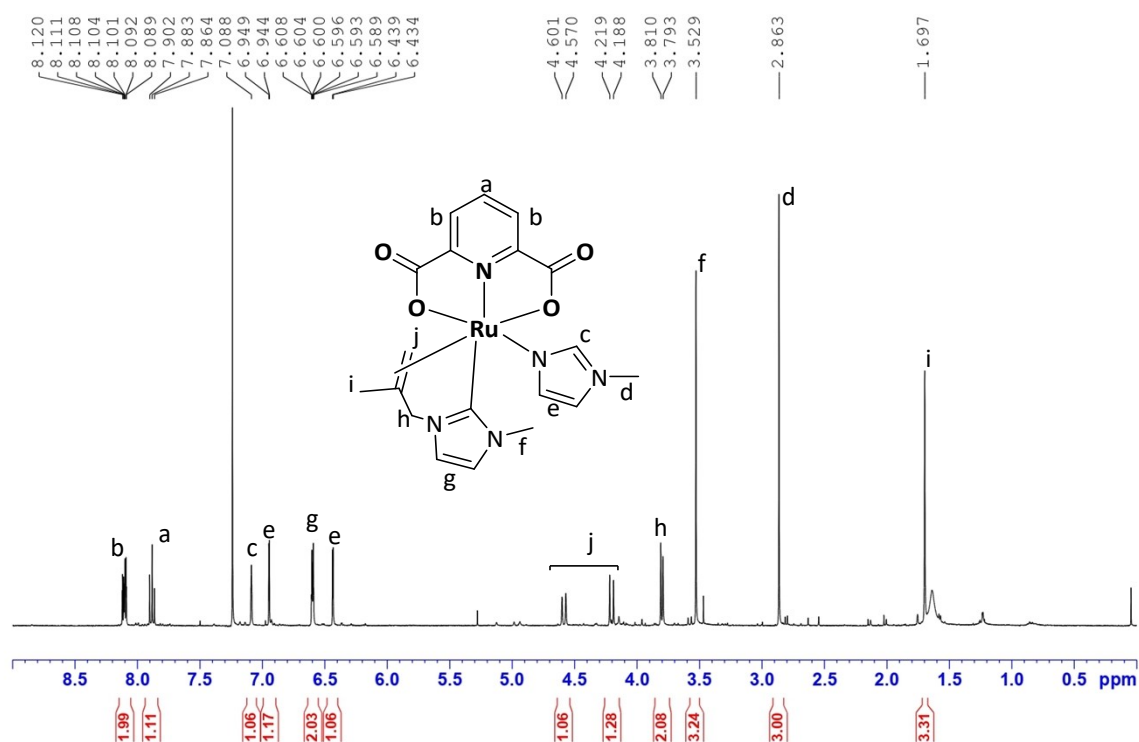

Figure S17 C11: <sup>1</sup>H NMR spectrum

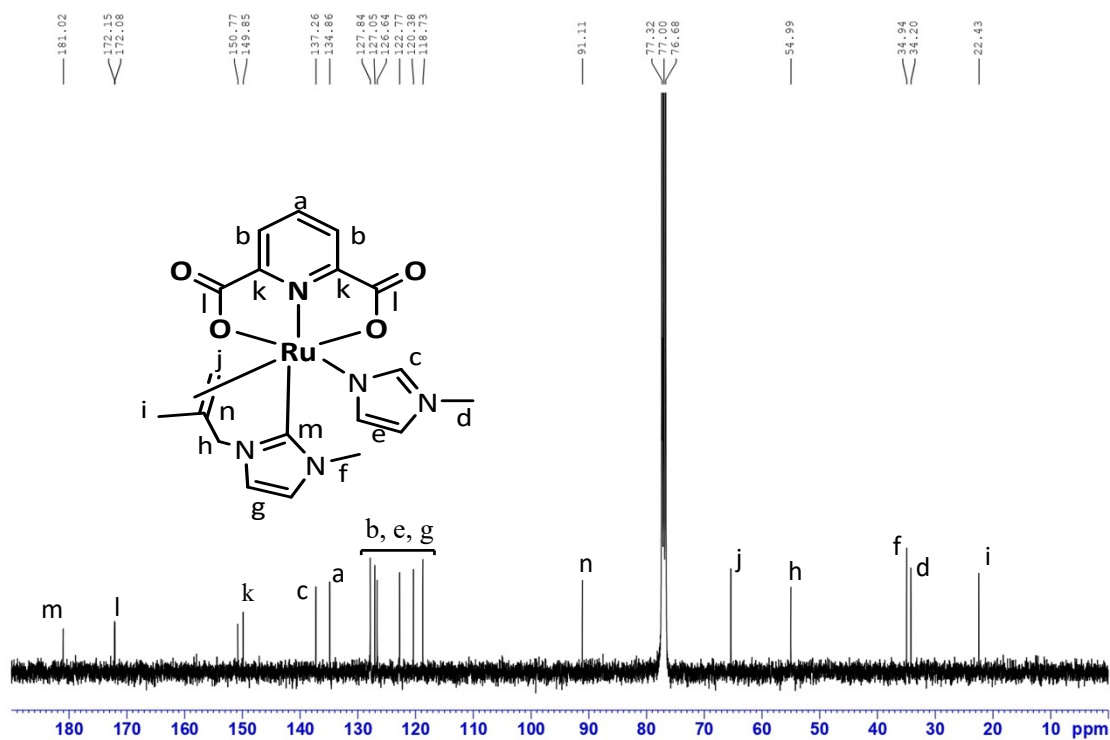

Figure S18 C11: <sup>13</sup>C NMR spectrum





O=C1C=CC(=O)N1C2=CC=CC=C2C3=C(C4=CC=CC=C4)N5C=CC=C5Ru67C8=CC=CC=C8C9=CC=CC=C89C67

Chemical shift (ppm): 8.056, 8.030, 7.884, 7.858, 7.833, 7.813, 7.792, 7.765, 7.739, 7.678, 7.492, 7.016, 6.722, 4.428, 4.419, 4.410, 3.581, 3.505, 3.495, 3.487, 2.607, 2.598, 2.584, 2.560, 2.532, 2.507, 2.483, 2.460, 2.336, 2.315, 2.292, 2.149.

Integration values: 2.06, 3.94, 0.91, 0.91, 0.83, 1.90, 2.51, 1.70, 11.43.

**Figure S21 C5:**  $^1\text{H}$  NMR spectrum

### 3. Crystallographic details of **C2-C6**, **C8-C12** (Tables S1-S3)

**Table S1:** Crystallographic parameters for NHC Complexes.

| Description                                  | C2                                                               | C3                                                                            | C4                                                               | C5                                                               | C6                                                               |
|----------------------------------------------|------------------------------------------------------------------|-------------------------------------------------------------------------------|------------------------------------------------------------------|------------------------------------------------------------------|------------------------------------------------------------------|
| Empirical formula                            | C <sub>20</sub> H <sub>25</sub> N <sub>3</sub> O <sub>5</sub> Ru | C <sub>46</sub> H <sub>53</sub> N <sub>6</sub> O <sub>8</sub> Ru <sub>2</sub> | C <sub>26</sub> H <sub>27</sub> N <sub>3</sub> O <sub>4</sub> Ru | C <sub>27</sub> H <sub>29</sub> N <sub>3</sub> O <sub>4</sub> Ru | C <sub>26</sub> H <sub>26</sub> N <sub>4</sub> O <sub>6</sub> Ru |
| Formula weight                               | 488.50                                                           | 1020.08                                                                       | 546.58                                                           | 560.60                                                           | 591.58                                                           |
| Temperature (K)                              | 149.99(10)                                                       | 149.99(10)                                                                    | 149.99(10)                                                       | 150.00(10)                                                       | 150.00(10)                                                       |
| Crystal system                               | orthorhombic                                                     | monoclinic                                                                    | orthorhombic                                                     | monoclinic                                                       | orthorhombic                                                     |
| Space group                                  | <i>P</i> 2 <sub>1</sub> 2 <sub>1</sub> 2 <sub>1</sub>            | <i>C</i> 2/ <i>m</i>                                                          | <i>Pca</i> 2 <sub>1</sub>                                        | <i>P</i> 2 <sub>1</sub> / <i>c</i>                               | <i>Pca</i> 2 <sub>1</sub>                                        |
| a (Å)                                        | 7.82300(10)                                                      | 13.30480(10)                                                                  | 17.24420(10)                                                     | 17.23840(10)                                                     | 12.99141(15)                                                     |
| b (Å)                                        | 15.2957(2)                                                       | 13.5619(2)                                                                    | 12.15900(10)                                                     | 14.09470(10)                                                     | 14.05629(16)                                                     |
| c (Å)                                        | 16.3651(2)                                                       | 12.14960(10)                                                                  | 22.0006(2)                                                       | 9.53400(10)                                                      | 12.95619(16)                                                     |
| α (°)                                        | 90                                                               | 90                                                                            | 90                                                               | 90                                                               | 90                                                               |
| β (°)                                        | 90                                                               | 96.6700(10)                                                                   | 90                                                               | 93.4940(10)                                                      | 90                                                               |
| γ (°)                                        | 90                                                               | 90                                                                            | 90                                                               | 90                                                               | 90                                                               |
| Volume (Å <sup>3</sup> )                     | 1958.22(4)                                                       | 2177.42(4)                                                                    | 4612.92(6)                                                       | 2312.17(3)                                                       | 2365.94(5)                                                       |
| Z                                            | 4                                                                | 2                                                                             | 8                                                                | 4                                                                | 4                                                                |
| ρ <sub>calc</sub> (cm <sup>3</sup> )         | 1.657                                                            | 1.556                                                                         | 1.574                                                            | 1.610                                                            | 1.661                                                            |
| μ (mm <sup>-1</sup> )                        | 6.813                                                            | 6.121                                                                         | 5.825                                                            | 5.827                                                            | 5.811                                                            |
| F(000)                                       | 1000.0                                                           | 1046.0                                                                        | 2240.0                                                           | 1152.0                                                           | 1220.0                                                           |
| Radiation (λ, Å)                             | CuKα (λ = 1.54184)                                               | CuKα (λ = 1.54184)                                                            | CuKα (λ = 1.54184)                                               | CuKα (λ = 1.54184)                                               | CuKα (λ = 1.54184)                                               |
| Reflections collected                        | 23077                                                            | 23298                                                                         | 50019                                                            | 49229                                                            | 31519                                                            |
| Independent reflections                      | 3988                                                             | 2421                                                                          | 9577                                                             | 4891                                                             | 4799                                                             |
| R <sub>int</sub>                             | 0.0413                                                           | 0.0381                                                                        | 0.0419                                                           | 0.0312                                                           | 0.0483                                                           |
| Data/restraints/parameters                   | 3988/0/268                                                       | 2421/30/192                                                                   | 9577/1/616                                                       | 4891/0/318                                                       | 4799/1/335                                                       |
| Goodness-of-fit on F <sup>2</sup>            | 1.113                                                            | 1.139                                                                         | 1.124                                                            | 1.099                                                            | 1.156                                                            |
| Final R indexes [all data]                   | R <sub>1</sub> = 0.0253,<br>wR <sub>2</sub> = 0.0628             | R <sub>1</sub> = 0.0367,<br>wR <sub>2</sub> = 0.0799                          | R <sub>1</sub> = 0.0324,<br>wR <sub>2</sub> = 0.0794             | R <sub>1</sub> = 0.0276,<br>wR <sub>2</sub> = 0.0719             | R <sub>1</sub> = 0.0415,<br>wR <sub>2</sub> = 0.1186             |
| Largest diff. peak/hole (e Å <sup>-3</sup> ) | 0.43/-0.92                                                       | 0.84/-1.15                                                                    | 0.55/-0.59                                                       | 0.56/-0.82                                                       | 0.55/-1.00                                                       |

| Description                                  | C8                                                                               | C9                                                                                                        | C10                                                              | C11                                                              | C12                                                              |
|----------------------------------------------|----------------------------------------------------------------------------------|-----------------------------------------------------------------------------------------------------------|------------------------------------------------------------------|------------------------------------------------------------------|------------------------------------------------------------------|
| Empirical formula                            | C <sub>35</sub> H <sub>34</sub> N <sub>4</sub> O <sub>6</sub> Cl <sub>6</sub> Ru | C <sub>136</sub> H <sub>136.2</sub> Cl <sub>17.37</sub> N <sub>20</sub> O <sub>35.2</sub> Ru <sub>4</sub> | C <sub>18</sub> H <sub>21</sub> N <sub>3</sub> O <sub>5</sub> Ru | C <sub>19</sub> H <sub>25</sub> N <sub>5</sub> O <sub>6</sub> Ru | C <sub>26</sub> H <sub>24</sub> N <sub>4</sub> O <sub>4</sub> Ru |
| Formula weight                               | 920.43                                                                           | 3634.17                                                                                                   | 460.45                                                           | 520.51                                                           | 557.56                                                           |
| Temperature (K)                              | 149.99(10)                                                                       | 149.98(10)                                                                                                | 150.00(2)                                                        | 149.99(10)                                                       | 149.99(10)                                                       |
| Crystal system                               | triclinic                                                                        | monoclinic                                                                                                | triclinic                                                        | triclinic                                                        | orthorhombic                                                     |
| Space group                                  | <i>P</i> -1                                                                      | <i>P</i> 2 <sub>1</sub> / <i>n</i>                                                                        | <i>P</i> -1                                                      | <i>P</i> -1                                                      | <i>P</i> 2 <sub>1</sub> 2 <sub>1</sub> 2 <sub>1</sub>            |
| a (Å)                                        | 9.9781(2)                                                                        | 9.9817(5)                                                                                                 | 9.7789(8)                                                        | 8.2408(2)                                                        | 12.9825(3)                                                       |
| b (Å)                                        | 12.8763(2)                                                                       | 14.0691(8)                                                                                                | 10.0997(9)                                                       | 10.3384(3)                                                       | 13.1403(2)                                                       |
| c (Å)                                        | 15.9233(3)                                                                       | 26.5049(15)                                                                                               | 10.8427(9)                                                       | 14.7449(4)                                                       | 13.4427(3)                                                       |
| α (°)                                        | 81.329(2)                                                                        | 90                                                                                                        | 74.531(3)                                                        | 109.197(2)                                                       | 90                                                               |
| β (°)                                        | 75.973(2)                                                                        | 93.040(4)                                                                                                 | 64.202(3)                                                        | 91.635(2)                                                        | 90                                                               |
| γ (°)                                        | 72.202(2)                                                                        | 90                                                                                                        | 79.030(3)                                                        | 112.158(2)                                                       | 90                                                               |
| Volume (Å <sup>3</sup> )                     | 1883.32(7)                                                                       | 3716.9(4)                                                                                                 | 925.81(14)                                                       | 1081.90(5)                                                       | 2293.24(8)                                                       |
| Z                                            | 2                                                                                | 1                                                                                                         | 2                                                                | 2                                                                | 4                                                                |
| ρ <sub>calc</sub> (cm <sup>3</sup> )         | 1.623                                                                            | 1.624                                                                                                     | 1.652                                                            | 1.598                                                            | 1.615                                                            |
| μ (mm <sup>-1</sup> )                        | 0.893                                                                            | 6.803                                                                                                     | 0.882                                                            | 0.770                                                            | 0.726                                                            |
| F(000)                                       | 932.0                                                                            | 1845.0                                                                                                    | 468.0                                                            | 532.0                                                            | 1136.0                                                           |
| Radiation (λ, Å)                             | MoKα (λ = 0.71073)                                                               | CuKα (λ = 1.54184)                                                                                        | MoKα (λ = 0.71073)                                               | MoKα (λ = 0.71073)                                               | MoKα (λ = 0.71073)                                               |
| Reflections collected                        | 45900                                                                            | 21596                                                                                                     | 41333                                                            | 23445                                                            | 38524                                                            |
| Independent reflections                      | 9100                                                                             | 7101                                                                                                      | 3832                                                             | 5671                                                             | 6431                                                             |
| R <sub>int</sub>                             | 0.0334                                                                           | 0.0772                                                                                                    | 0.1304                                                           | 0.0381                                                           | 0.0499                                                           |
| Data/restraints/parameters                   | 9100/438/637                                                                     | 7101/3/512                                                                                                | 3832/0/259                                                       | 5671/0/305                                                       | 6431/0/318                                                       |
| Goodness-of-fit on F <sup>2</sup>            | 1.047                                                                            | 1.066                                                                                                     | 1.061                                                            | 1.061                                                            | 1.024                                                            |
| Final R indexes [all data]                   | R <sub>1</sub> = 0.0287,<br>wR <sub>2</sub> = 0.0758                             | R <sub>1</sub> = 0.1017, wR <sub>2</sub> =<br>0.2764                                                      | R <sub>1</sub> = 0.0437,<br>wR <sub>2</sub> = 0.1030             | R <sub>1</sub> = 0.0322,<br>wR <sub>2</sub> = 0.0804             | R <sub>1</sub> = 0.0299,<br>wR <sub>2</sub> = 0.0713             |
| Largest diff. peak/hole (e Å <sup>-3</sup> ) | 0.61/-0.56                                                                       | 1.76/-1.54                                                                                                | 0.77/-0.81                                                       | 1.10/-0.96                                                       | 1.08/-0.52                                                       |

**Table S2:** Bond lengths (SC-XRD) for **2-6, 8-12**.

| <b>C2</b>    |                   | <b>C3</b>    |                   | <b>C4</b>    |                   | <b>C5</b>    |                   | <b>C6</b>    |                   |
|--------------|-------------------|--------------|-------------------|--------------|-------------------|--------------|-------------------|--------------|-------------------|
| <b>Atoms</b> | <b>Length (Å)</b> |
| Ru1-O1       | 2.124(3)          | Ru1-O1       | 2.123(2)          | Ru1-O1       | 2.113(4)          | Ru1-O1       | 2.0991(15)        | Ru1-O1       | 2.113(4)          |
| Ru1-O3       | 2.127(3)          | Ru1-O1'      | 2.123(2)          | Ru1-O3       | 2.123(4)          | Ru1-O3       | 2.1394(15)        | Ru1-O3       | 2.128(3)          |
| Ru1-N1       | 2.021(3)          | Ru1-N1       | 2.022(4)          | Ru1-N1       | 2.013(5)          | Ru1-N1       | 2.0124(18)        | Ru1-N1       | 2.019(5)          |
| Ru1-C8       | 2.116(4)          | Ru1-C5       | 2.104(5)          | Ru1-C8       | 2.126(6)          | Ru1-C8       | 2.124(2)          | Ru1-C8       | 2.110(6)          |
| Ru1-C13      | 2.190(4)          | Ru1-C11      | 2.187(3)          | Ru1-C19      | 2.332(6)          | Ru1-C20      | 2.175(2)          | Ru1-C19      | 2.181(5)          |
| Ru1-C14      | 2.206(4)          | Ru1-C11'     | 2.187(3)          | Ru1-C20      | 2.312(6)          | Ru1-C21      | 2.194(2)          | Ru1-C20      | 2.179(5)          |
| Ru1-C17      | 2.320(4)          | Ru1-C14      | 2.313(3)          | Ru1-C23      | 2.194(6)          | Ru1-C24      | 2.337(2)          | Ru1-C23      | 2.308(6)          |
| Ru1-C18      | 2.343(5)          | Ru1-C14'     | 2.313(3)          | Ru1-C24      | 2.177(7)          | Ru1-C25      | 2.324(2)          | Ru1-C24      | 2.321(6)          |
| <b>C8</b>    |                   | <b>C9</b>    |                   | <b>C10</b>   |                   | <b>C11</b>   |                   | <b>C12</b>   |                   |
| <b>Atoms</b> | <b>Length (Å)</b> |
| Ru1-O1       | 2.1332(12)        | Ru1-O1       | 2.141(7)          | Ru1-O1       | 2.102(3)          | Ru1-O1       | 2.1075(15)        | Ru1-O1       | 2.121(2)          |
| Ru1-O3       | 2.1325(12)        | Ru1-O3       | 2.081(7)          | Ru1-O3       | 2.131(3)          | Ru1-O3       | 2.1324(16)        | Ru1-O3       | 2.116(2)          |
| Ru1-N1       | 2.0173(15)        | Ru1-N1       | 2.003(9)          | Ru1-O5       | 2.199(3)          | Ru1-N4       | 2.1630(17)        | Ru1-N4       | 2.169(3)          |
| Ru1-C8       | 2.1185(16)        | Ru1-C8       | 2.161(10)         | Ru1-N1       | 2.008(3)          | Ru1-N1       | 1.9977(18)        | Ru1-N1       | 2.007(3)          |
| Ru1-C26      | 2.1849(18)        | Ru1-C25      | 2.175(10)         | Ru1-C8       | 1.974(4)          | Ru1-C8       | 2.012(2)          | Ru1-C8       | 2.022(3)          |
| Ru1-C27      | 2.2095(17)        | Ru1-C26      | 2.161(10)         | Ru1-C13      | 2.153(4)          | Ru1-C13      | 2.182(2)          | Ru1-C13      | 2.201(4)          |
| Ru1-C30      | 2.3075(17)        | Ru1-C29      | 2.341(9)          | Ru1-C12      | 2.193(4)          | Ru1-C14      | 2.157(2)          | Ru1-C14      | 2.163(3)          |
| Ru1-C31      | 2.3182(17)        | Ru1-C30      | 2.308(9)          | C12-C13      | 1.398(6)          | C13-C14      | 1.392(4)          | C12-C13      | 1.405(5)          |

**Table S3:** Bond angles (SC-XRD) for **2-6, 8-12**.

| <b>C2</b>          |            | <b>C3</b>           |            | <b>C4</b>          |            | <b>C5</b>          |           | <b>C6</b>          |            |
|--------------------|------------|---------------------|------------|--------------------|------------|--------------------|-----------|--------------------|------------|
| Atoms              | Angle (°)  | Atoms               | Angle (°)  | Atoms              | Angle (°)  | Atoms              | Angle (°) | Atoms              | Angle (°)  |
| <b>O3-Ru1-C13</b>  | 122.95(15) | <b>O1-Ru1-C11</b>   | 121.78(11) | <b>O3-Ru1-C23</b>  | 119.3(2)   | <b>O3-Ru1-C21</b>  | 89.23(7)  | <b>O3-Ru1-C19</b>  | 121.31(19) |
| <b>N1-Ru1-C18</b>  | 95.37(15)  | <b>N1-Ru1-C11</b>   | 161.27(9)  | <b>N1-Ru1-C19</b>  | 93.1(2)    | <b>N1-Ru1-C24</b>  | 95.57(8)  | <b>N1-Ru1-C19</b>  | 161.8(2)   |
| <b>O3-Ru1-C8</b>   | 88.26(14)  | <b>O1-Ru1-C5</b>    | 89.94(7)   | <b>O3-Ru1-C8</b>   | 94.4(2)    | <b>O3-Ru1-C8</b>   | 87.02(7)  | <b>O3-Ru1-C8</b>   | 91.6(2)    |
| <b>O3-Ru1-C17</b>  | 75.56(14)  | <b>O1-Ru1-C14</b>   | 107.70(11) | <b>O3-Ru1-C19</b>  | 75.4(2)    | <b>O3-Ru1-C24</b>  | 76.78(7)  | <b>O3-Ru1-C20</b>  | 84.32(19)  |
| <b>N1-Ru1-C8</b>   | 95.88(15)  | <b>N1-Ru1-C5</b>    | 92.33(15)  | <b>N1-Ru1-C8</b>   | 96.3(2)    | <b>N1-Ru1-C8</b>   | 92.36(8)  | <b>N1-Ru1-C8</b>   | 94.9(2)    |
| <b>O1-Ru1-C8</b>   | 92.67(14)  | <b>O1-Ru1-C8</b>    | 89.94(7)   | <b>O1-Ru1-C8</b>   | 85.8(2)    | <b>O1-Ru1-C8</b>   | 90.46(7)  | <b>O1-Ru1-C8</b>   | 90.1(2)    |
| <b>C17-Ru1-C18</b> | 34.01(16)  | <b>C11-Ru1-C11'</b> | 37.15(18)  | <b>C19-Ru1-C20</b> | 33.9(3)    | <b>C24-Ru1-C25</b> | 34.10(8)  | <b>C19-Ru1-C20</b> | 37.3(2)    |
| <b>C8-Ru1-C14</b>  | 88.57(16)  | <b>O1-Ru1-C11'</b>  | 84.62(11)  | <b>C8-Ru1-C24</b>  | 87.8(2)    | <b>C8-Ru1-C21</b>  | 89.37(8)  | <b>C8-Ru1-C24</b>  | 159.1(2)   |
| <b>O3-Ru1-C14</b>  | 86.31(18)  | <b>O1-Ru1-C11</b>   | 121.78(11) | <b>O3-Ru1-C24</b>  | 82.5(2)    | <b>O3-Ru1-C25</b>  | 107.26(7) | <b>O3-Ru1-C24</b>  | 108.5(2)   |
| <b>N1-Ru1-O3</b>   | 76.81(13)  | <b>N1-Ru1-O1</b>    | 76.81(6)   | <b>N1-Ru1-O3</b>   | 76.61(18)  | <b>N1-Ru1-O3</b>   | 76.13(7)  | <b>N1-Ru1-O3</b>   | 76.92(18)  |
| <b>N1-Ru1-O1</b>   | 76.21(13)  | <b>N1-Ru1-O1'</b>   | 76.82(6)   | <b>N1-Ru1-O1</b>   | 77.0(2)    | <b>N1-Ru1-O1</b>   | 77.86(7)  | <b>N1-Ru1-O1</b>   | 76.80(18)  |
| <b>O1-Ru1-O3</b>   | 152.96(12) | <b>O1-Ru1-O1'</b>   | 153.60(12) | <b>O1-Ru1-O3</b>   | 153.44(18) | <b>O1-Ru1-O3</b>   | 153.73(6) | <b>O1-Ru1-O3</b>   | 153.72(14) |
| <b>C8</b>          |            | <b>C9</b>           |            | <b>C10</b>         |            | <b>C11</b>         |           | <b>C12</b>         |            |
| <b>O3-Ru1-C27</b>  | 88.17(6)   | <b>O3-Ru1-C26</b>   | 85.3(4)    | <b>O3-Ru1-C12</b>  | 122.76(13) | <b>O3-Ru1-C13</b>  | 122.37(8) | <b>O3-Ru1-C14</b>  | 122.05(12) |
| <b>N1-Ru1-C30</b>  | 90.60(6)   | <b>N1-Ru1-C25</b>   | 161.5(4)   | <b>N1-Ru1-C12</b>  | 159.89(14) | <b>N1-Ru1-C13</b>  | 160.16(9) | <b>N1-Ru1-C13</b>  | 161.52(11) |
| <b>O3-Ru1-C8</b>   | 87.09(6)   | <b>O3-Ru1-C8</b>    | 92.7(4)    | <b>O3-Ru1-C8</b>   | 95.45(14)  | <b>O3-Ru1-C8</b>   | 96.57(7)  | <b>O3-Ru1-C8</b>   | 87.23(11)  |
| <b>O1-Ru1-C31</b>  | 74.59(6)   | <b>O3-Ru1-C25</b>   | 121.3(4)   | <b>O3-Ru1-O5</b>   | 87.15(12)  | <b>O3-Ru1-N4</b>   | 88.69(6)  | <b>O3-Ru1-N4</b>   | 91.20(10)  |
| <b>N1-Ru1-C8</b>   | 96.74(6)   | <b>N1-Ru1-C8</b>    | 94.3(4)    | <b>N1-Ru1-C8</b>   | 99.18(15)  | <b>N1-Ru1-C8</b>   | 94.73(8)  | <b>N1-Ru1-C8</b>   | 96.59(12)  |
| <b>O1-Ru1-C8</b>   | 93.64(6)   | <b>O1-Ru1-C26</b>   | 121.4(4)   | <b>N1-Ru1-O5</b>   | 87.13(13)  | <b>N1-Ru1-N4</b>   | 88.90(7)  | <b>N1-Ru1-N4</b>   | 90.10(10)  |
| <b>C26-Ru1-C27</b> | 36.98(7)   | <b>C26-Ru1-C25</b>  | 36.3(4)    | <b>C12-Ru1-C13</b> | 37.51(16)  | <b>C13-Ru1-C14</b> | 37.42(10) | <b>C13-Ru1-C14</b> | 37.55(14)  |
| <b>C8-Ru1-C27</b>  | 89.19(6)   | <b>C8-Ru1-C26</b>   | 88.5(4)    | <b>C8-Ru1-C12</b>  | 79.90(16)  | <b>C8-Ru1-C13</b>  | 80.52(8)  | <b>C8-Ru1-C13</b>  | 79.16(14)  |
| <b>O3-Ru1-C26</b>  | 124.76(6)  | <b>O3-Ru1-C29</b>   | 74.9(4)    | <b>O3-Ru1-C13</b>  | 85.35(13)  | <b>O3-Ru1-C14</b>  | 85.14(8)  | <b>O3-Ru1-C13</b>  | 84.64(11)  |
| <b>N1-Ru1-O3</b>   | 76.70(5)   | <b>N1-Ru1-O3</b>    | 76.5(3)    | <b>N1-Ru1-O3</b>   | 77.36(12)  | <b>N1-Ru1-O3</b>   | 77.17(7)  | <b>N1-Ru1-O3</b>   | 77.16(9)   |
| <b>N1-Ru1-O1</b>   | 76.37(5)   | <b>N1-Ru1-O1</b>    | 77.0(3)    | <b>N1-Ru1-O1</b>   | 77.26(12)  | <b>N1-Ru1-O1</b>   | 77.50(7)  | <b>N1-Ru1-O1</b>   | 77.29(10)  |
| <b>O1-Ru1-O3</b>   | 152.96(5)  | <b>O3-Ru1-O1</b>    | 153.4(3)   | <b>O3-Ru1-O1</b>   | 154.49(11) | <b>O3-Ru1-O1</b>   | 154.62(6) | <b>O3-Ru1-O1</b>   | 154.44(9)  |

4. Electrochemical details (Figure S22)

DCM @ 25°C (150 mV/s)  $\text{Fc}^*$  vs  $\text{HFc} = -0.553 \text{ V}$

DCE @ 70°C (150 mV/s)  $\text{Fc}^*$  vs  $\text{HFc} = -0.544 \text{ V}$

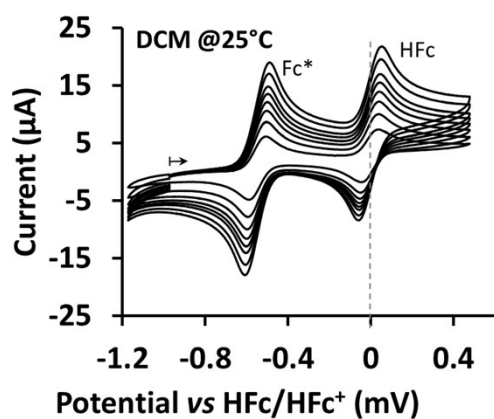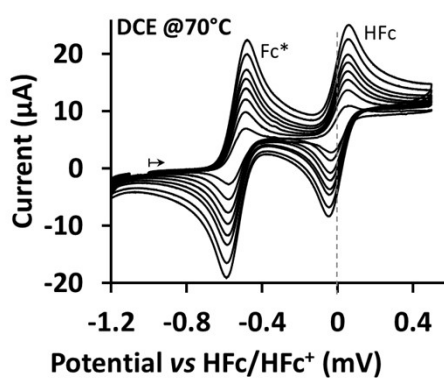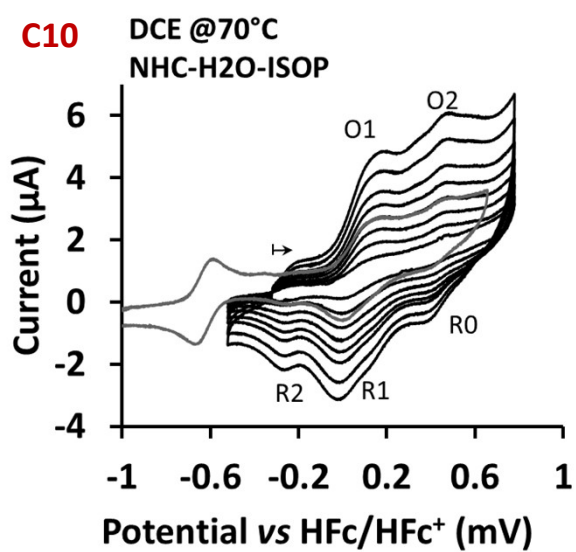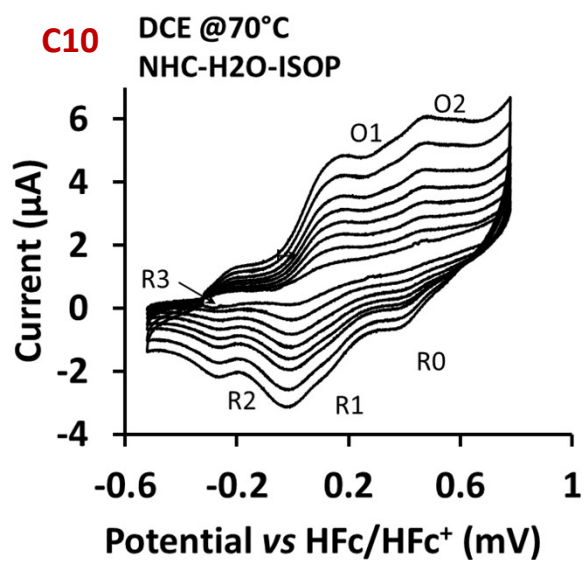

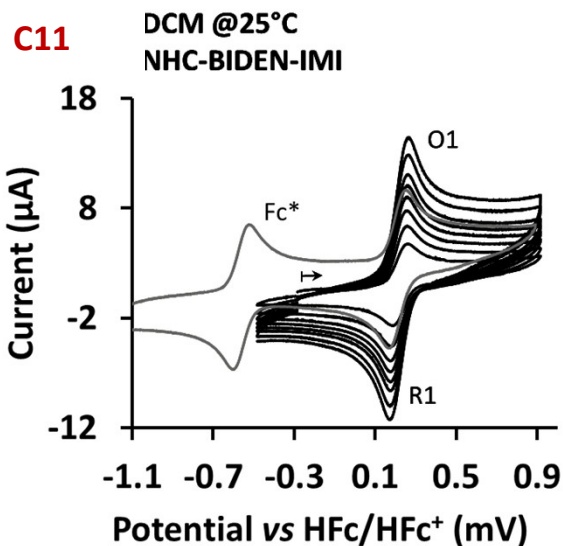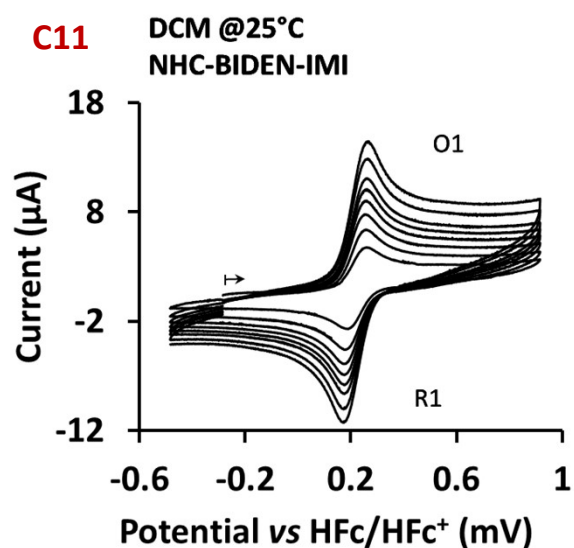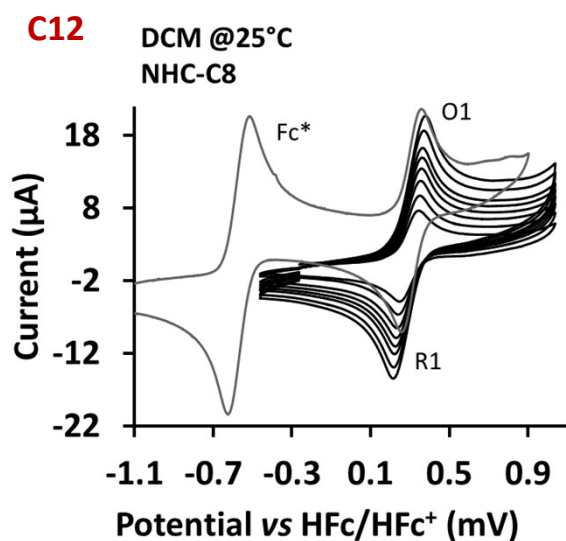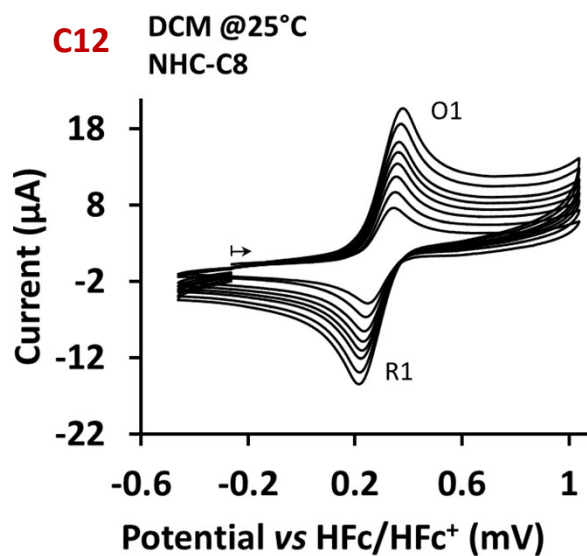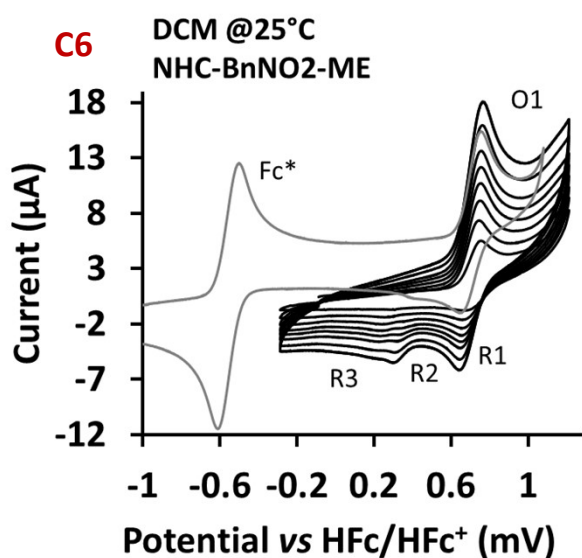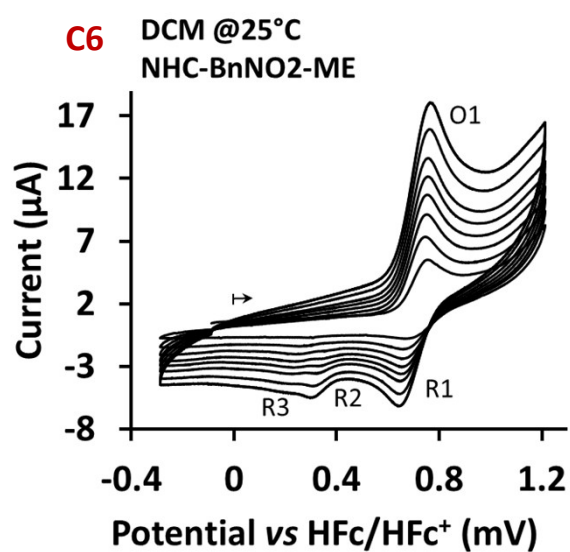

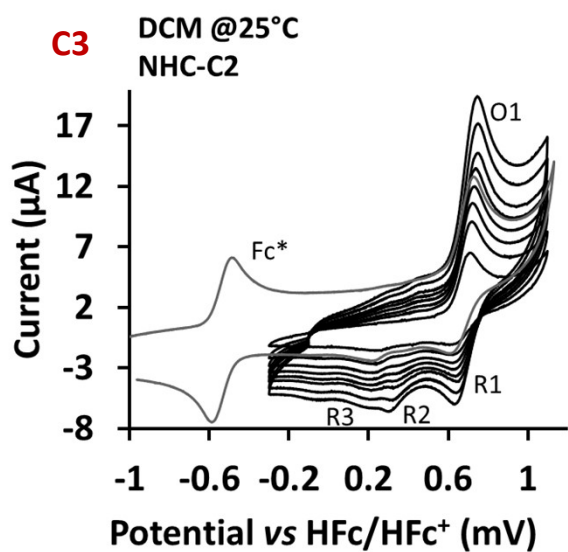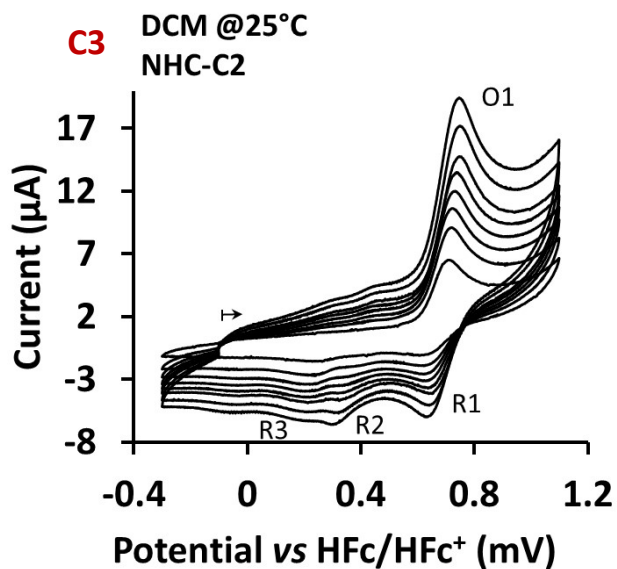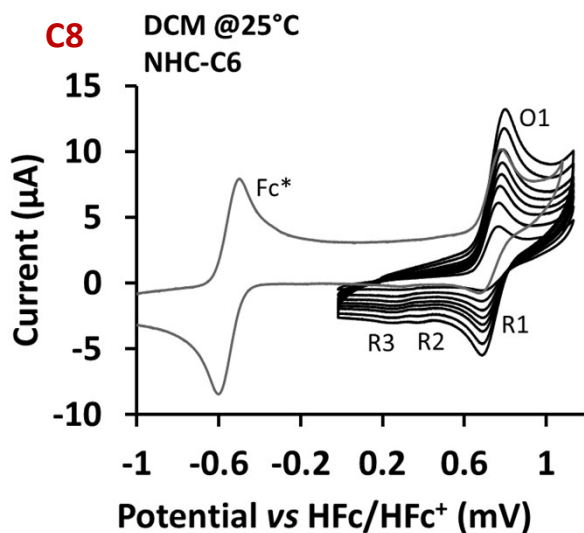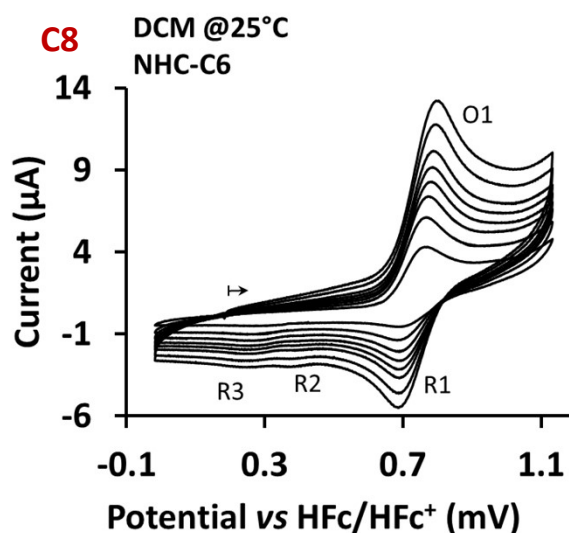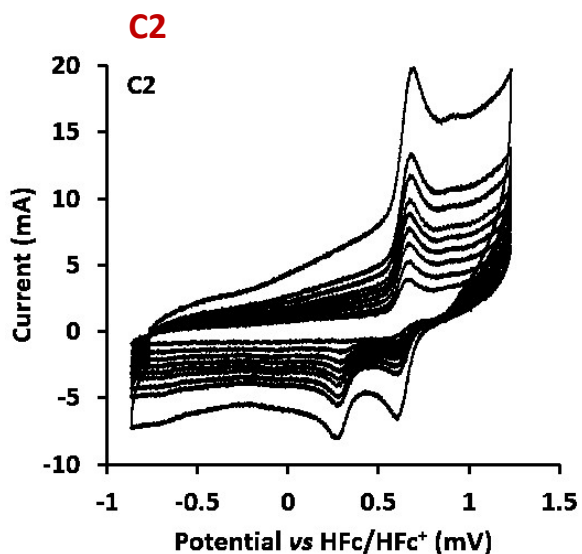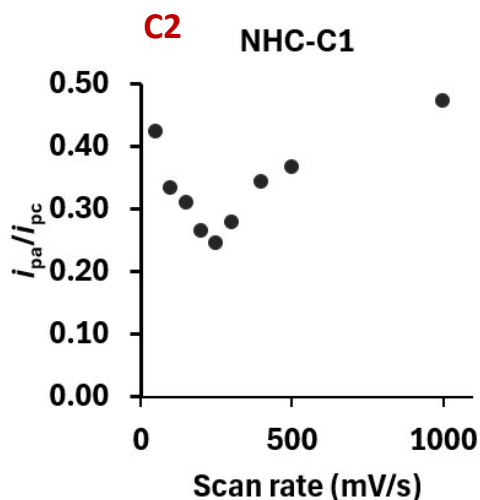



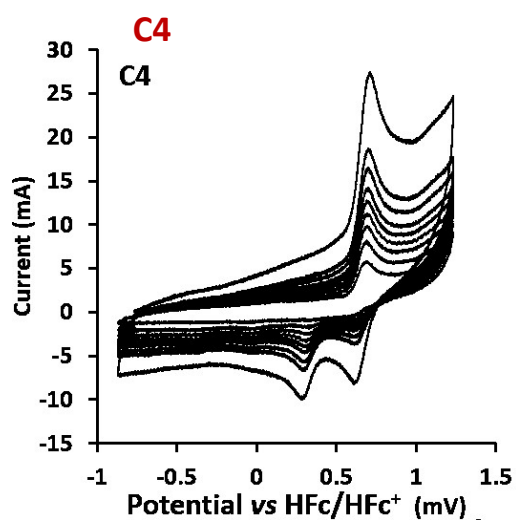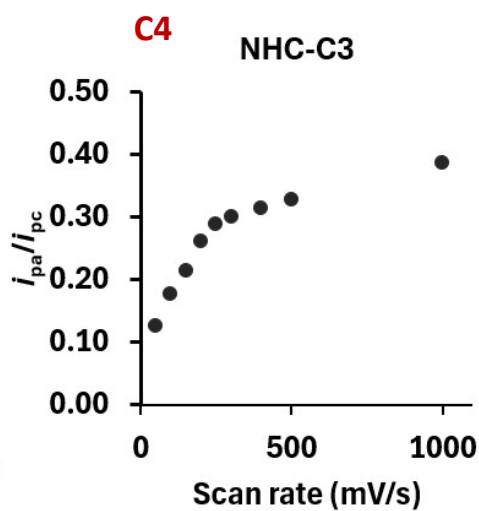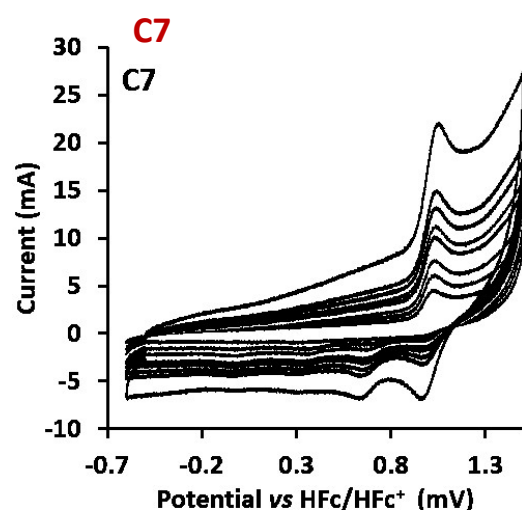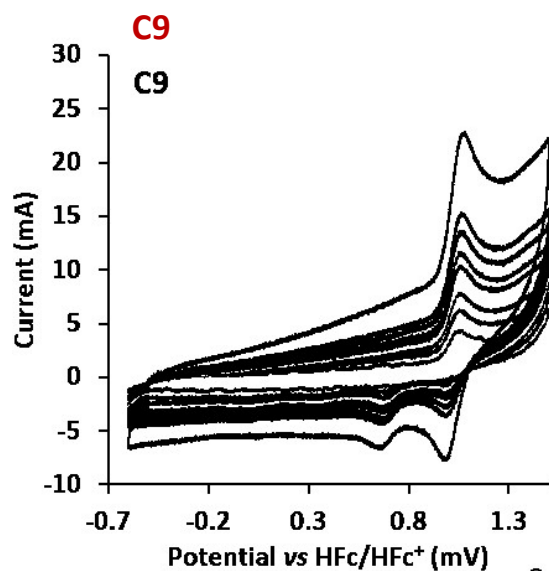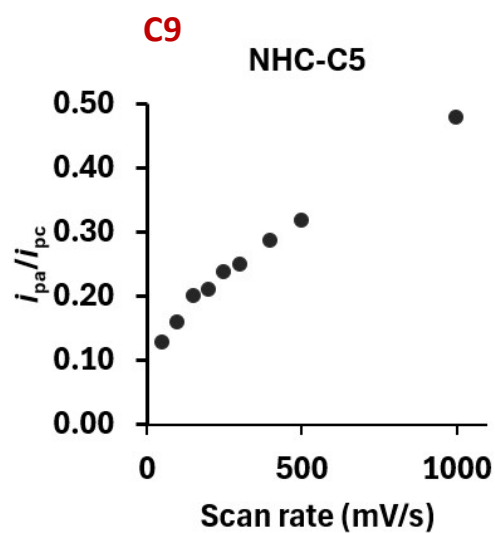

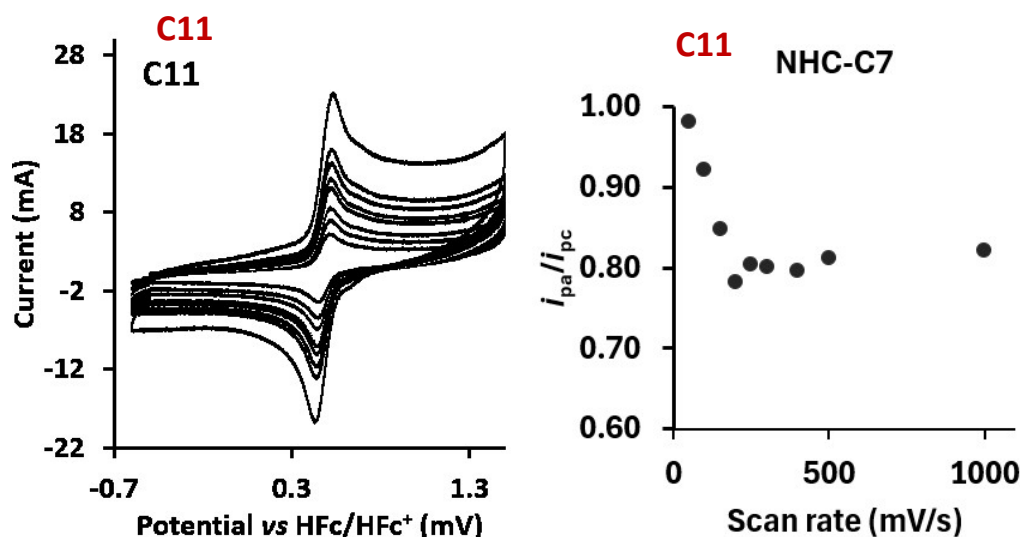

Additional discussion (Electrochemical analysis):

Complexes **C10-C12** exhibit a chemically reversible  $\text{Ru}^{\text{II}}/\text{Ru}^{\text{III}}$  redox process (O1/R1) across all scan rates ( $i_{\text{pa}}/i_{\text{pc}} = 1.0$ ), occurring at increasingly positive potentials: 0.085 V (**C10**), 0.215 V (**C11**), and 0.288 V (**C12**). This trend contradicts expectations based on the electron-donating abilities of the ligands, which follow the order: aqua < imidazole-containing ligand < pyridine-containing ligand. Instead, the observed redox potential sequence ( $\text{C10} < \text{C11} < \text{C12}$ ) suggests that factors beyond simple electron donation influence the redox behaviour of these carbene-containing Ru complexes. One key factor is the stabilisation of the  $\text{Ru}^{3+}$  state. The aqua ligand, through intermolecular hydrogen bonding and solvation effects (considering DCE was used instead of DCM), may lower the oxidation potential by stabilising the oxidised species. Additionally, proton-coupled electron transfer (PCET) in the aqua complex could further facilitate oxidation.<sup>51</sup> In contrast, pyridine, a stronger donor, can also act as a  $\pi$ -acceptor, potentially destabilise  $\text{Ru}^{3+}$  and increasing the oxidation potential. Moreover, subtle structural reorganisations upon oxidation may play a role. The aqua complex may undergo favourable structural adjustments that ease oxidation,<sup>52</sup> while the more rigid coordination of pyridine could resist such changes, making oxidation more challenging.<sup>53,54</sup> These combined effects could potentially explain why the aqua complex exhibits the lowest oxidation potential, despite being the weakest donor, while pyridine, its electronic and structural influences, results in the highest oxidation potential.

## 5. Catalysis details (Table S4)

**Table S4:** Alcohol Oxidation Optimization Process

| Complex | Benzyl alcohol (mmol) | Oxidant (mmol)                     | KOH    | Solvent (mL)                    | Cat. (mol%) | Time (hr) | Conversion (%) | TOF (h <sup>-1</sup> ) |
|---------|-----------------------|------------------------------------|--------|---------------------------------|-------------|-----------|----------------|------------------------|
| C0      | 1                     | <sup>t</sup> BuOOH: 2              | -      | Acet:2                          | 2           | 0.5       | 94             | 94                     |
| C0      | 1                     | <sup>t</sup> BuOOH: 2              | -      | Acet:2                          | 2           | 1         | 89             | 45                     |
| C0      | 1                     | <sup>t</sup> BuOOH: 2              | -      | Acet:2                          | 2           | 2         | 79             | 20                     |
| C0      | 1                     | <sup>t</sup> BuOOH: 2              | -      | Acet:2                          | 3           | 1         | 71             | 24                     |
| C0      | 1                     | <sup>t</sup> BuOOH: 2              | -      | Acet:2                          | 3           | 2         | 90             | 15                     |
| C0      | 1                     | H <sub>2</sub> O <sub>2</sub> : 2  | -      | Acet:2                          | 3           | 2         | 19             | 3                      |
| C0      | 1                     | <sup>t</sup> BuOOH: 2              | -      | -                               | 3           | 2         | 78             | 13                     |
| C0      | 1                     | <sup>t</sup> BuOOH: 2              | -      | Acet:2                          | 1           | 0.5       | 57             | 114                    |
| C0      | 1                     | <sup>t</sup> BuOOH: 2              | -      | Acet:2                          | 1           | 1         | 55             | 55                     |
| C0      | 1                     | <sup>t</sup> BuOOH: 2              | -      | Acet:2                          | 1           | 2         | 66             | 33                     |
| C0      | 1                     | <sup>t</sup> BuOOH: 1.5            | -      | Acet:2                          | 3           | 0.5       | 29             | 19                     |
| C0      | 1                     | <sup>t</sup> BuOOH: 1.5            | -      | Acet:2                          | 3           | 1         | 32             | 11                     |
| C0      | 1                     | <sup>t</sup> BuOOH: 1.5            | -      | Acet:2                          | 3           | 2         | 46             | 8                      |
| C0      | 1                     | <sup>t</sup> BuOOH: 2              | -      | Acet:2                          | 3           | 3         | 95             | 11                     |
| C0      | 1                     | <sup>t</sup> BuOOH: 2              | -      | Acet:2                          | 3           | 4         | 97             | 8                      |
| C0      | 1                     | <sup>t</sup> BuOOH: 2              | 5 mol% | Acet:2<br>H <sub>2</sub> O: 0.5 | 3           | 2         | 93             | 16                     |
| C0      | 1                     | <sup>t</sup> BuOOH: 2              | 1 mmol | Acet:2<br>H <sub>2</sub> O: 0.5 | 3           | 2         | 74             | 12                     |
| C0      | 1                     | <sup>t</sup> BuOOH: 1              | -      | Acet:2                          | 3           | 1         | 36             | 12                     |
| C0      | 1                     | <sup>t</sup> BuOOH: 2 <sup>a</sup> | -      | Acet:2                          | 3           | 2         | 87             | 15                     |
| C0      | 1                     | <sup>t</sup> BuOOH: 1              | -      | Acet:2                          | 3           | 2         | 53             | 9                      |

<sup>a</sup> Batch addition, 1hr interval

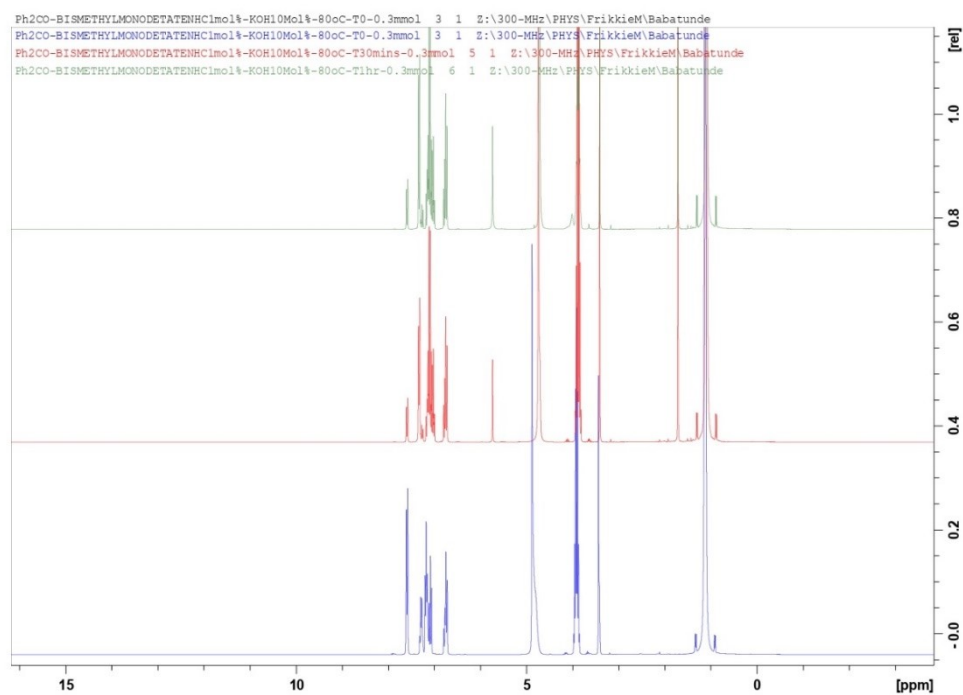

**Figure S23:** Stacked NMR spectra of transfer hydrogenation of benzophenone using **C2** at time; 0, 0.5 h and 1 h. Ph<sub>2</sub>CO (0.3 mmol), anisole (0.3 mmol), <sup>i</sup>PrOH (300  $\mu$ L), catalyst (1 mol %), C<sub>6</sub>D<sub>6</sub>, 80  $^{\circ}$ C, KOH (10 mol%).

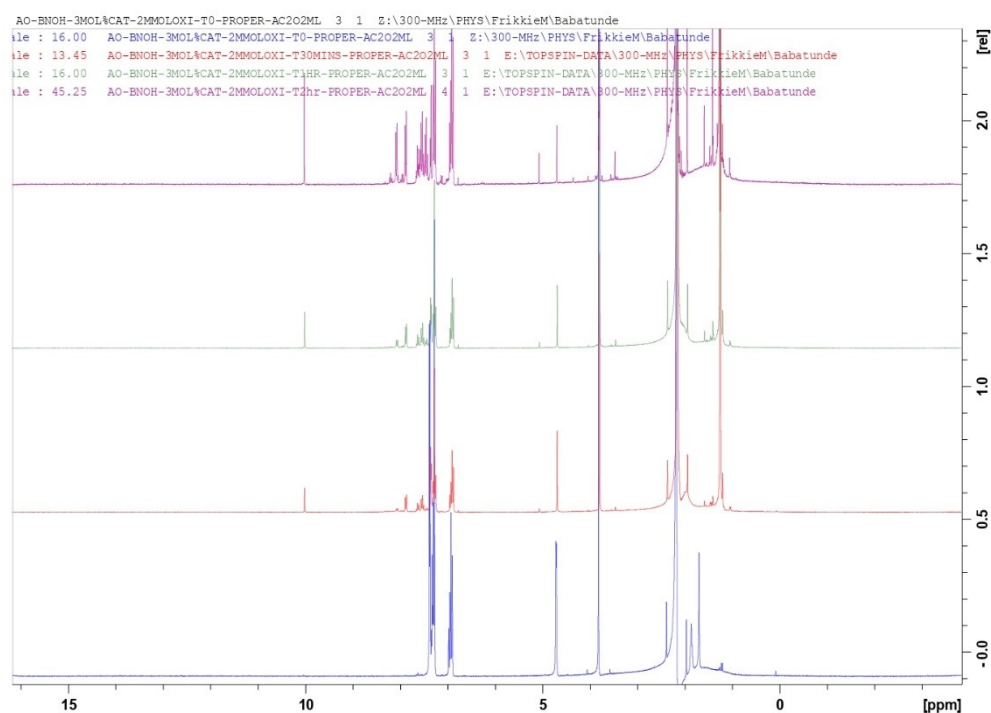

**Figure S24:** Stacked NMR spectra of alcohol oxidation of benzyl alcohol using **C1** at time; 0, 0.5 h, 1 h and 2 h. General conditions: substrate (1 mmol), catalytic loading (3 mol%), anisole (1 mmol), acetone (2 mL), <sup>t</sup>BuOOH (2 mmol), RT.

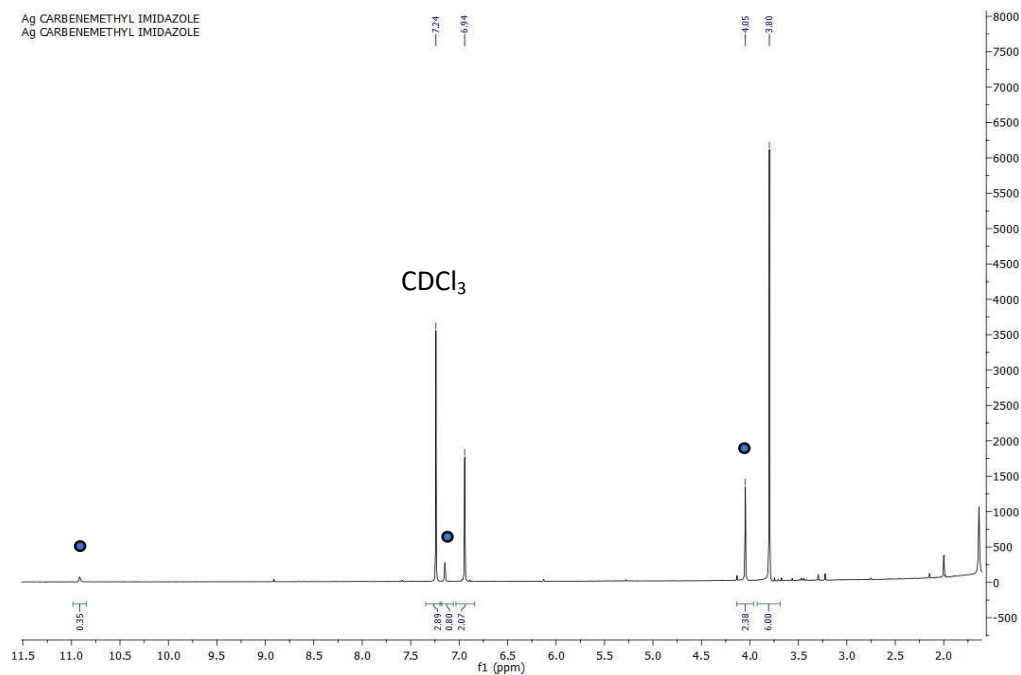

**Figure S25:**  $^1\text{H}$  NMR spectrum of the reaction mixture containing the bis-carbene silver(I) intermediate using **L2** after 1 hour. Signals related to unreacted  $[\text{HL2}]\text{Cl}$  is indicated by blue dots ( $\approx 35\%$ ).

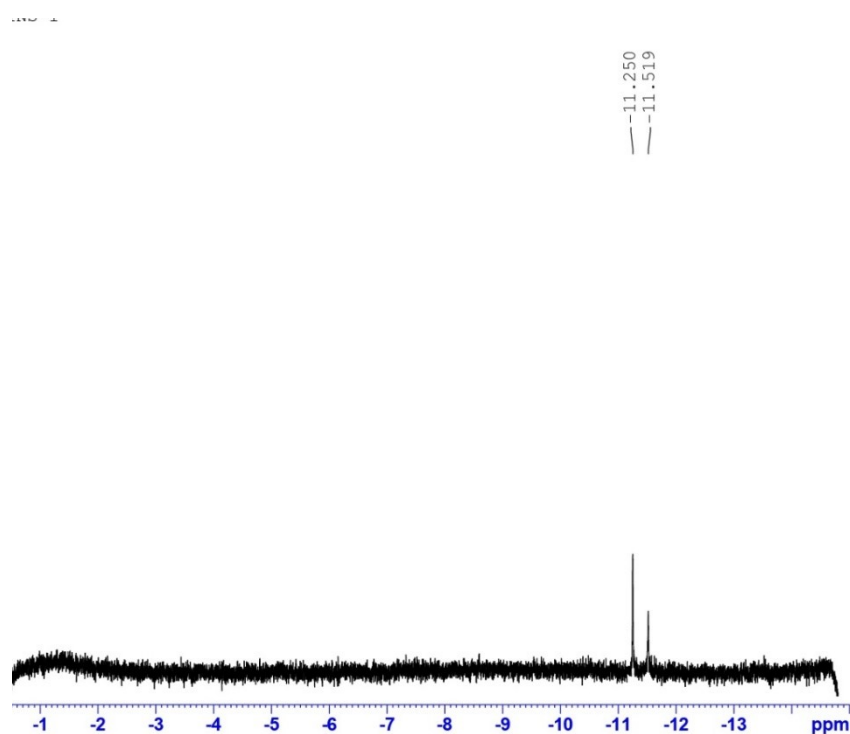

**Figure S26:**  $^1\text{H}$  NMR spectrum of the hydride region of a transfer hydrogenation sample taken after 4 hours using **C2** as catalyst.

General conditions: substrate (2 mmol), catalytic loading (3 mol%), anisole (2 mmol), acetone (2 mL),  $t\text{BuOOH}$  (4 mmol), RT.

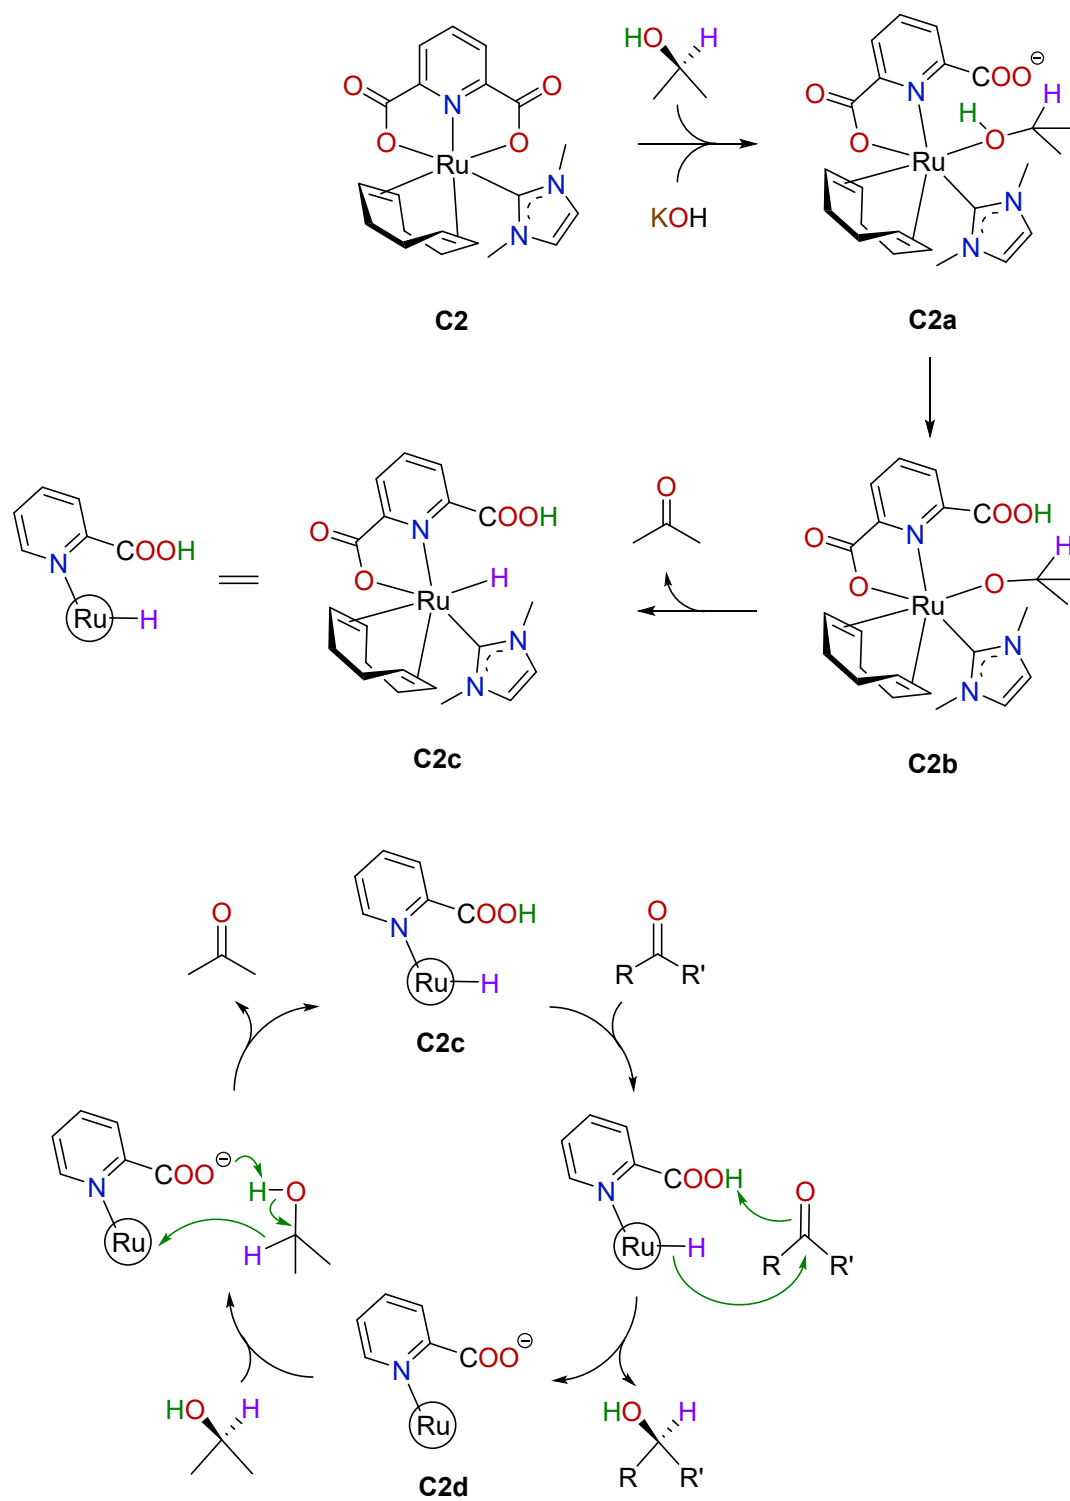

**Scheme S1:** Proposed mechanism for the catalysed transfer hydrogenation reaction using **C2**.
